# Supplementary material for: A Systematic Literature Review of Predictors of Erythropoiesis-Stimulating Agent Failure in Lower-Risk Myelodysplastic Syndromes
Source: MDPI journal article supplement (doi:10.3390/jcm13092702), 2024-05-04
Supplement: s1 [file s1]

## SUPPLEMENTARY MATERIALS

Please note that reference citations in the Supplementary Materials refer to the reference list in the main text.

**Table S1.** Quantitative associations of age and response to ESA.

| Author, Year                 | Intervention                                                                                                                                                                                         | ESA-Treated Sample Size | Age Information                | Response Definition   | Effect Measure (95% CI)                  | Is the Result Significant? | Author's Interpretation                                                                                                                                                                                      |
|------------------------------|------------------------------------------------------------------------------------------------------------------------------------------------------------------------------------------------------|-------------------------|--------------------------------|-----------------------|------------------------------------------|----------------------------|--------------------------------------------------------------------------------------------------------------------------------------------------------------------------------------------------------------|
| Houston et al., 2017 [48]    | ESAs (not specified), weekly, EPO 40–60,000 IU/week or DPO 300–500 µg Q2–3 weeks                                                                                                                     | 208                     | Age (continuous outcome)       | IWG 2006 criteria     | OR: 1 (CI: NR); $p = 0.08$               | Non-significant            | Age, LDH, and ferritin were not predictive of ESA response                                                                                                                                                   |
| Latagliata et al., 2008 [35] | rhEPO, BIW, 40,000 IU QW, dosing reduction was considered for patients with Hb increase $\geq 2$ g/dL within first 2 weeks of therapy and in patients reaching Hb = 12 g/dL at any time of the study | 60                      | Age (continuous outcome)       | IWG 2000 MDS criteria | HR: 1.011 (CI: 0.981–1.042); $p = 0.464$ | Non-significant            | NR                                                                                                                                                                                                           |
| Park et al., 2010 [39]       | ESAs (mixed), weekly, epoetin- $\alpha$ or - $\beta$ : 60,000 U; DPO: 300 µg                                                                                                                         | 112                     | Age $\geq 75$ vs. $< 75$ years | IWG 2006 criteria     | OR: 1.05 (CI: 0.5–2.4); $p = 0.8$        | Non-significant            | Age, gender, WHO diagnosis, karyotype, multilineage dysplasia, percentage of bone marrow blasts, IPSS, Hb level, ferritin level, type of ESA, and addition of G-CSF had no significant influence on response |

Abbreviations: BIW = twice per week; CI = confidence interval; DPO = darbepoetin; EPO = erythropoietin; ESA = erythropoiesis-stimulating agent; G-CSF = granulocyte colony-stimulating factor; Hb = hemoglobin; HR = hazard ratio; IPSS = International Prognostic Scoring System; IWG = International Working Group; LDH = lactate dehydrogenase; MDS = myelodysplastic syndromes; NR = not reported; OR = odds ratio; QW = once weekly; rhEPO = recombinant human EPO; WHO = World Health Organization.

<sup>a</sup>References for response criteria: IWG 2000 [60]; IWG 2006 [12].

**Table S2.** Studies comparing age as a prognostic factor for response vs. non-response to ESA treatment.

| Author, Year               | Intervention                                                                                                                                                                   | ESA-Treated Sample Size | Type of Prognostic Factor Analyzed                  | Factors Adjusted for in Multivariate Analysis                                                                                                                                                                                                                                                  | Prognostic Factor Definition                                                                                                                                                      | Response Definition <sup>a</sup>                             | Outcome                                                                                                   | <i>p</i> Value                     |
|----------------------------|--------------------------------------------------------------------------------------------------------------------------------------------------------------------------------|-------------------------|-----------------------------------------------------|------------------------------------------------------------------------------------------------------------------------------------------------------------------------------------------------------------------------------------------------------------------------------------------------|-----------------------------------------------------------------------------------------------------------------------------------------------------------------------------------|--------------------------------------------------------------|-----------------------------------------------------------------------------------------------------------|------------------------------------|
| Antelo et al., 2019 [52]   | EPO- $\alpha$ , DPO, or EPO- $\alpha$ and DPO                                                                                                                                  | 37                      | <div>Responder</div> <hr/> <div>Non-responder</div> | NA                                                                                                                                                                                                                                                                                             | Age at diagnosis, years                                                                                                                                                           | IWG MDS 2006 and the IWG MDS/MPN 2015 [62] response criteria | <div>Median (range): 73 (67–93)</div> <hr/> <div>Median (range): 71 (52–85)</div>                         | <i>p</i> = 0.2024, non-significant |
| Balleari et al., 2011 [43] | rhEPO SC, QW for minimum 12 weeks, 40,000 IU                                                                                                                                   | 55                      | <div>Responder</div> <hr/> <div>Non-responder</div> | NA                                                                                                                                                                                                                                                                                             | <div>Age at therapy beginning (<math>\geq 78</math> vs. 78 years), <i>n</i> (%)</div> <hr/> <div>Age at therapy beginning (<math>\geq 78</math> vs. 78 years), <i>n</i> (%)</div> | IWG 2006 MDS criteria                                        | <div>16 (61.5%) vs. 20 (69.0%)</div> <hr/> <div>10 (38.5%) vs. 9 (31.0%)</div>                            | <i>p</i> = 0.56, non-significant   |
| Balleari et al., 2019 [54] | rhEPO QW/BIW, 40,000 IU, standard dose vs. high dose                                                                                                                           | 445                     | <div>Responder</div> <hr/> <div>Non-responder</div> | Age, MDS WHO 2008 classification, bone marrow blasts ( $<5\%$ vs. $\geq 5\%$ ), endogenous EPO ( $>200$ vs. $\leq 200$ mU/mL), transfusion dependency (yes vs. no), Hb ( $>8$ vs. $\leq 8$ g/dL), ferritin ( $>350$ vs. $\leq 350$ $\mu\text{g/L}$ ), and IPSS score (Int-1 or higher vs. Low) | <div>Age <math>\leq 75</math> years, <i>n</i> (%)</div> <hr/> <div>Age <math>&gt; 75</math> years, <i>n</i> (%)</div>                                                             | Hematological improvement according to IWG 2006 criteria     | <div>82 (47.7%)</div> <hr/> <div>90 (52.3%)</div> <hr/> <div>82 (58.6%)</div> <hr/> <div>58 (41.4%)</div> | <i>p</i> = 0.068, non-significant  |
| Frisan et al., 2010 [40]   | ESAs (mixed), NR, epoetin- $\alpha$ or - $\beta$ weekly. DPO- $\alpha$ weekly, epoetin- $\alpha$ or - $\beta$ at doses of 60,000 IU, DPO- $\alpha$ 300 $\mu\text{g} \pm$ G-CSF | 127                     | ESA response                                        | NA                                                                                                                                                                                                                                                                                             | Age, years                                                                                                                                                                        | IWG 2006 MDS criteria                                        | Median (IQR): 76 (71–81)                                                                                  | <i>p</i> = 0.325, non-significant  |

| Author, Year                         | Intervention                                                                                                                                                                                                                                                           | ESA-Treated Sample Size | Type of Prognostic Factor Analyzed | Factors Adjusted for in Multivariate Analysis | Prognostic Factor Definition  | Response Definition <sup>a</sup>                                                                                                                                                | Outcome                    | <i>p</i> Value                   |
|--------------------------------------|------------------------------------------------------------------------------------------------------------------------------------------------------------------------------------------------------------------------------------------------------------------------|-------------------------|------------------------------------|-----------------------------------------------|-------------------------------|---------------------------------------------------------------------------------------------------------------------------------------------------------------------------------|----------------------------|----------------------------------|
| Gotlib et al., 2009 [36]             | DPO- $\alpha$ NR, weekly, 250–1100 $\mu\text{g} \pm$ G-CSF                                                                                                                                                                                                             | 24                      | Responder                          | NA                                            | Median age of patients, years | IWG 2006 MDS criteria                                                                                                                                                           | Median (range): 69 (55–84) | <i>p</i> = 0.21, non-significant |
|                                      |                                                                                                                                                                                                                                                                        |                         | Non-responder                      | NA                                            |                               |                                                                                                                                                                                 | Median (range): 61 (31–84) |                                  |
| Hellström-Lindberg et al., 1997 [26] | ESAs (mixed), SC, weekly, G-CSF 0.3–1.0–3.0 $\mu\text{g}/\text{kg}/\text{day}$ (in first study cohort), 30–75–150 $\mu\text{g}/\text{d}$ SC (in second study cohort) and EPO: 60–120 U/kg/d SC (in first study cohort) and 5000–10,000 U/d SC (in second study cohort) | 98                      | Responder                          | NA                                            | Age, years                    | CR = increase in Hb to >11.5 g/dL; and PR = increase in Hb of >1.5 g/dL or a 100% reduction of RBC transfusion need in combination with a stable Hb level for >6 weeks on study | Mean (SD): 73.4 (9.9)      | <i>p</i> = 0.014, significant    |
|                                      |                                                                                                                                                                                                                                                                        |                         | Non-responder                      |                                               |                               |                                                                                                                                                                                 | Mean (SD): 68.0 (10.6)     |                                  |
| Isnard et al., 1994 [23]             | rhEPO, TIW, 40 U/kg/day with a progressive increase to 300 U/kg/day                                                                                                                                                                                                    | 20                      | Responder                          | NA                                            | Age, years                    | CR defined by the correction of anemia, PR as a durable rise in Hb concentration of >1.5 g/dL and/or a durable reduction of 50% in the transfusion needs during                 | Median (range): 68 (52–81) | <i>p</i> > 0.05, non-significant |
|                                      |                                                                                                                                                                                                                                                                        |                         | Non-responder                      |                                               |                               |                                                                                                                                                                                 | Median (range): 66 (26–86) |                                  |

| Author, Year             | Intervention                                     | ESA-Treated Sample Size | Type of Prognostic Factor Analyzed | Factors Adjusted for in Multivariate Analysis | Prognostic Factor Definition      | Response Definition <sup>a</sup>                                   | Outcome                      | <i>p</i> Value                     |
|--------------------------|--------------------------------------------------|-------------------------|------------------------------------|-----------------------------------------------|-----------------------------------|--------------------------------------------------------------------|------------------------------|------------------------------------|
|                          |                                                  |                         |                                    |                                               |                                   | the 3 months of treatment compared to the pre-study 3-month period |                              |                                    |
| Moura et al., 2019 [51]  | Epoetin- $\alpha$ , NR, weekly, 30,000–60,000 IU | 36                      | Responder                          | NA                                            | Age <75 years, <i>n</i> (%)       | IWG 2006 MDS criteria                                              | 11 (73.3%)                   | <i>p</i> = 0.4178, non-significant |
|                          |                                                  |                         | Non-responder                      |                                               |                                   |                                                                    | 4 (26.7%)                    |                                    |
|                          |                                                  |                         | Responder                          |                                               | Age $\geq$ 75 years, <i>n</i> (%) |                                                                    | 18 (85.7%)                   |                                    |
|                          |                                                  |                         | Non-responder                      |                                               |                                   |                                                                    | 3 (14.3%)                    |                                    |
|                          |                                                  |                         | Responder                          |                                               | Age $\leq$ 60 years, <i>n</i> (%) |                                                                    | 1 (100%)                     | <i>p</i> = 0.6502, non-significant |
|                          |                                                  |                         | Non-responder                      |                                               |                                   |                                                                    | 0 (0%)                       |                                    |
|                          |                                                  |                         | Responder                          |                                               | Age >60–75 years, <i>n</i> (%)    |                                                                    | 13 (76.5%)                   | NR                                 |
|                          |                                                  |                         | Non-responder                      |                                               |                                   |                                                                    | 4 (23.5%)                    |                                    |
|                          |                                                  |                         | Responder                          |                                               | Age >75–90 years, <i>n</i> (%)    |                                                                    | 13 (81.2%)                   | NR                                 |
|                          |                                                  |                         | Non-responder                      |                                               |                                   |                                                                    | 3 (18.8%)                    |                                    |
|                          |                                                  |                         | Responder                          |                                               | Age >90 years, <i>n</i> (%)       |                                                                    | 2 (100%)                     | NR                                 |
|                          |                                                  |                         | Non-responder                      |                                               |                                   |                                                                    | 0 (%)                        |                                    |
| Muniz et al., 2019 [53]  | ESAs (not specified), NR                         | 68                      | Responder                          | NA                                            | Median age of patients, years     | IWG MDS criteria <sup>b</sup>                                      | Median (range): 75.7 (66–91) | <i>p</i> = 0.8, non-significant    |
|                          |                                                  |                         | Non-responder                      |                                               |                                   |                                                                    | Median (range): 76 (66–88)   |                                    |
| Rosati et al., 2019 [55] | EPO- $\alpha$ , NR, weekly, 80,000 IU            | 193                     | ESA response                       | NA                                            | Age >65 years                     | IWG 2006 MDS criteria                                              | NR                           | <i>p</i> = 0.029, significant      |

| Author, Year            | Intervention                                                                                                                                                                                                                                                                                                                                                         | ESA-Treated Sample Size | Type of Prognostic Factor Analyzed | Factors Adjusted for in Multivariate Analysis | Prognostic Factor Definition | Response Definition <sup>a</sup> | Outcome                    | <i>p</i> Value                        |
|-------------------------|----------------------------------------------------------------------------------------------------------------------------------------------------------------------------------------------------------------------------------------------------------------------------------------------------------------------------------------------------------------------|-------------------------|------------------------------------|-----------------------------------------------|------------------------------|----------------------------------|----------------------------|---------------------------------------|
| Stasi et al., 2005 [33] | DPO- $\alpha$ , SC, QW, 150 $\mu$ g fixed dose, increased to 300 mg fixed dose if after 12 weeks there was no or suboptimal ER. If responders achieved Hb levels >13 g/dL, the DPO doses had to be adjusted to maintain Hb levels between 11 and 13 g/dL. Treatment extended beyond 24 weeks, individually tailored, was given to patients with a continued response | 53                      | Responder                          | NA                                            | Age, years                   | IWG 2000 MDS criteria            | Median (range): 70 (59–82) | <i>p</i> = 0.68, non-significant      |
|                         |                                                                                                                                                                                                                                                                                                                                                                      |                         | Non-responder                      |                                               |                              |                                  | Median (range): 69 (60–80) |                                       |
| Stasi et al., 2004 [31] | rhEPO, weekly, 40,000 IU. rhEPO dose was increased to 60,000 IU fixed dose if after 6 weeks there was no or suboptimal ER                                                                                                                                                                                                                                            | 48                      | Responder                          | NA                                            | Age, years                   | IWG 2000 MDS criteria            | Median (range): 69 (56–81) | <i>p</i> = 0.434978, non-significant  |
|                         |                                                                                                                                                                                                                                                                                                                                                                      |                         | Non-responder                      |                                               |                              |                                  | Median (range): 71 (53–80) |                                       |
| Stasi et al., 2002 [29] | ATRA + rhEPO, TIW, 150–300 U/kg. EPO dose was initiated at 150 U/kg and was increased to 300 U/kg if after 6 weeks there was                                                                                                                                                                                                                                         | 27                      | Responder                          | NA                                            | Median age                   | NR                               | Median (range): 66 (54–77) | <i>p</i> = 0.319 330, non-significant |
|                         |                                                                                                                                                                                                                                                                                                                                                                      |                         | Non-responder                      |                                               |                              |                                  | Median (range):            |                                       |

| Author, Year              | Intervention                                                                                                                | ESA-Treated Sample Size | Type of Prognostic Factor Analyzed | Factors Adjusted for in Multivariate Analysis | Prognostic Factor Definition | Response Definition <sup>a</sup>                                                                                                                                                                                                                                                                                                  | Outcome                    | <i>p</i> Value                    |
|---------------------------|-----------------------------------------------------------------------------------------------------------------------------|-------------------------|------------------------------------|-----------------------------------------------|------------------------------|-----------------------------------------------------------------------------------------------------------------------------------------------------------------------------------------------------------------------------------------------------------------------------------------------------------------------------------|----------------------------|-----------------------------------|
|                           | no or there was suboptimal ER                                                                                               |                         |                                    |                                               |                              |                                                                                                                                                                                                                                                                                                                                   | 69 (52–78)                 |                                   |
| Stasi et al., 1999 [27]   | G-CSF + rhEPO, SC, TIW, 150–300 U/kg                                                                                        | 31                      | Responder                          | NA                                            | Median age                   | ERs categorized as GR, PR, or no response. GR: a rise in untransfused Hb concentrations of ≥2 g/dL or a 100% decrease in RBC transfusion requirements over the treatment period. PR: an increase in untransfused Hb values of 1–2 g/dL or a >50% decrease in RBC transfusion requirements. No response: defined as responses < PR | Median (range): 68 (56–73) | <i>p</i> , non-significant        |
|                           |                                                                                                                             |                         | Non-responder                      | NA                                            |                              |                                                                                                                                                                                                                                                                                                                                   | Median (range): 67 (50–80) |                                   |
| Westers et al., 2010 [38] | Epoetin was started at a dose of 30,000 IU QW. In absence of an increase in Hb of ≥1 g/dL (0.62 mM) within 6 weeks, epoetin | 46                      | Responder                          | NA                                            | Median age, years            | IWG 2006 response criteria                                                                                                                                                                                                                                                                                                        | Median (range): 69 (47–87) | <i>p</i> = 0.964, non-significant |
|                           |                                                                                                                             |                         | Non-responder                      |                                               |                              |                                                                                                                                                                                                                                                                                                                                   | Median (range):            |                                   |

| Author, Year            | Intervention                                                                                                                                                                                   | ESA-Treated Sample Size | Type of Prognostic Factor Analyzed | Factors Adjusted for in Multivariate Analysis | Prognostic Factor Definition | Response Definition <sup>a</sup>                                                                                                                                                     | Outcome                    | <i>p</i> Value                   |
|-------------------------|------------------------------------------------------------------------------------------------------------------------------------------------------------------------------------------------|-------------------------|------------------------------------|-----------------------------------------------|------------------------------|--------------------------------------------------------------------------------------------------------------------------------------------------------------------------------------|----------------------------|----------------------------------|
|                         | dose was escalated to 60,000 IU according to Hellström-Lindberg et al., [63] + G-CSF                                                                                                           |                         |                                    |                                               |                              |                                                                                                                                                                                      | 68 (40–90)                 |                                  |
| Stein et al., 1991 [22] | rhEPO, BIW, 800 U/kg for first 4 weeks, increment of 400 U/kg at 4-week interval to max. dose of 1600 U/kg BIW in case of suboptimal response, 1600 U/kg BIW in 12–24 weeks (open-label phase) | 20                      | Responder                          | NA                                            | Age, years                   | Increase in hematocrit of $\geq 4$ percentage points over baseline, independent of transfusions, or elimination of all transfusions with the hematocrit maintained at baseline level | Median (range): 71 (34–83) | <i>p</i> > 0.10, non-significant |
|                         |                                                                                                                                                                                                |                         | Non-responder                      |                                               |                              |                                                                                                                                                                                      | Median (range): 66 (34–81) |                                  |

Abbreviations: ATRA = all-trans retinoic acid; BIW = twice per week; CR = complete response; DPO = darbepoetin; EPO = erythropoietin; ER = erythroid response; ESA = erythropoiesis-stimulating agent; G-CSF = granulocyte colony-stimulating factor; GR = good response; Hb = hemoglobin; Int = Intermediate; IPSS = International Prognostic Scoring System; IQR = interquartile range; IWG = International Working Group; MDS = myelodysplastic syndromes; MPN = myeloproliferative neoplasm; NA = not available; NR = not reported; PR = partial response; QW, once weekly; RBC = red blood cell; rhEPO = recombinant human erythropoietin; SC = subcutaneous; SD = standard deviation; TIW = three times per week; WHO = World Health Organization.

**Bolded results are from multivariate analyses.**

<sup>a</sup>References for response criteria: IWG 2000 [60]; IWG 2006 [12]; IWG MDS 2006 and IWG MDS/MPN 2015 [62].

<sup>b</sup>IWG criteria used unclear.

**Table S3.** Quantitative associations of bone marrow blasts and response to ESA.

| Author, Year                | Intervention                                                                          | ESA-Treated Sample Size | Blasts Information          | Response Definition <sup>a</sup> | Effect Measure: Value (95% CI)                                           | Is the Result Significant? | Author Interpretation of Results                                                                                                                                                                                                                    |
|-----------------------------|---------------------------------------------------------------------------------------|-------------------------|-----------------------------|----------------------------------|--------------------------------------------------------------------------|----------------------------|-----------------------------------------------------------------------------------------------------------------------------------------------------------------------------------------------------------------------------------------------------|
| Buckstein et al., 2017 [47] | ESAs (mixed), EPO 40,000 IU/week or DPO 300–500 µg Q2–3 weeks, for a minimum 12 weeks | 548                     | Blast for IPSS (<5 vs. ≥5%) | IWG 2006 MDS criteria            | OR: 1.42 (CI: NR); <i>p</i> = 0.15                                       | Non-significant            | Predictive factors for ESA response by univariate analysis included RBC transfusion independence, EPO level, ESA dose, ferritin, Nordic, MDS-CAN, and IPSS-R based scores, IPSS, IPSSR, and karyotype                                               |
| Houston et al., 2017 [48]   | EPO 40,000–60,000 IU/week or DPO 300–500 µg Q2–3 weeks                                | 208                     | Blasts%, <5 vs. >5%         | IWG 2006 MDS criteria            | OR: 2.9 (CI: NR); <i>p</i> = 0.02                                        | Significant                | Lower-risk IPSS and IPSS-R category, bone marrow blasts <5%, higher baseline Hb, higher Nordic score, lower European ESA score, lower EPO level, transfusion independence, and absence of G-CSF use were significantly associated with ESA response |
| Park et al., 2010 [39]      | Weekly epoetin-α or -β, 30,000–60,000 IU, or DPO 300 µg                               | 46                      | Blasts%, ≥5 vs. <5%         | IWG 2006 MDS criteria            | <i>N</i> = 48 vs. <i>N</i> = 67, OR: 0.51 (CI: 0.2–1.1); <i>p</i> = 0.09 | Non-significant            | In our cohort, only aberrant FCM and EPO levels were significant predictors of response to EPO/G-CSF treatment                                                                                                                                      |

Abbreviations: CI = confidence interval; DPO = darbepoetin; EPO = erythropoietin; ESA = erythropoiesis-stimulating agent; FCM = flow cytometry; G-CSF = granulocyte colony-stimulating factor; Hb = hemoglobin; IPSS = International Prognostic Scoring System; IPSS-R = Revised IPSS; IWG = International Working Group; MDS = myelodysplastic syndromes; MDS-CAN = Myelodysplastic Syndromes Registry of Canada; NR = not reported; OR = odds ratio; RBC = red blood cell.

<sup>a</sup>Reference for response criteria: IWG 2006 [12].



**Table S4.** Studies comparing bone marrow blasts as a prognostic factor for response vs. non-response to ESA treatment.

| Author, Year               | Intervention                                                                                      | N                        | Marrow Blast Description                                               | Response Definition <sup>a</sup>                                       | Factors Adjusted for in Multivariate Analysis                                                                                                                                                                                                                                              | Responder Status                                             | Outcome Unit of Measurement | Outcome                                            | p Value, Significance                                              |
|----------------------------|---------------------------------------------------------------------------------------------------|--------------------------|------------------------------------------------------------------------|------------------------------------------------------------------------|--------------------------------------------------------------------------------------------------------------------------------------------------------------------------------------------------------------------------------------------------------------------------------------------|--------------------------------------------------------------|-----------------------------|----------------------------------------------------|--------------------------------------------------------------------|
| Antelo et al., 2019 [52]   | EPO- $\alpha$ , DPO, or EPO- $\alpha$ and DPO                                                     | 16<br>19                 | % Bone marrow blasts                                                   | IWG 2006 MDS criteria                                                  | NA                                                                                                                                                                                                                                                                                         | Responders<br>Non-responders                                 | Median (range)              | 2 (0–4)<br>1 (0–4)                                 | $p = 0.6919$ , non-significant                                     |
| Balleari et al., 2019 [54] | rhEPO, QW/BIW, 40,000 IU                                                                          | 148<br>164<br>148<br>164 | Bone marrow blasts (%) <5<br><br>Bone marrow blasts (%) $\geq 5$       | Hematological improvement according to IWG 2006 criteria               | Age, MDS WHO 2008 classification, bone marrow blasts (<5% vs. $\geq 5\%$ ), endogenous EPO ( $>200$ vs. $\leq 200$ mU/mL), transfusion dependency (yes vs. no), Hb ( $>8$ vs. $\leq 8$ g/dL), ferritin ( $>350$ vs. $\leq 350$ $\mu\text{g/L}$ ), and IPSS score (Int-1 or higher vs. Low) | Responders<br>Non-responders<br>Responders<br>Non-responders | N (%)                       | 140 (55.1)<br>114 (44.9)<br>24 (41.4)<br>34 (58.6) | $p = 0.08$ , non-significant<br>NA<br>REF<br>NA                    |
| Boggio et al., 2021 [57]   | Weekly EPO- $\alpha$ 20,000–80,000 IU; DPO 150–300 $\mu\text{g}$                                  | 65<br>31<br>65<br>31     | Median blasts on flow cytometry<br><br>Median blasts on aspirate smear | IWG 2006 MDS criteria                                                  | NR                                                                                                                                                                                                                                                                                         | Responders<br>Non-responders<br>Responders<br>Non-responders | Median                      | 1.2<br>1.8<br>2.2<br>2.3                           | $p = 0.412$ , non-significant<br><br>$p = 0.079$ , non-significant |
| Frisan et al., 2010 [40]   | Epoetin- $\alpha$ or $\beta$ 60,000 IU weekly. DPO- $\alpha$ 300 $\mu\text{g}$ weekly $\pm$ G-CSF | 54<br>19                 | % Blasts                                                               | IWG 2006 MDS criteria                                                  | NA                                                                                                                                                                                                                                                                                         | Responders<br>Non-responders                                 | Median (IQR)                | 4 [2–5]<br>4 (3–6)                                 | $p = 0.227$ , non-significant                                      |
| Hellström-Lindberg et al., | ESAs (mixed), SC, weekly, G-CSF 0.3–1.0–3.0 $\mu\text{g/kg/day}$                                  | 41                       | Bone marrow blasts %                                                   | CR = increase in Hb to $>11.5$ g/dL; and PR = increase in Hb of $>1.5$ | NA                                                                                                                                                                                                                                                                                         | Responders                                                   | Mean (SD)                   | 69 (23)                                            | $p = 0.27$ , non-significant                                       |

| Author, Year             | Intervention                                                                                                                                                          | <i>N</i> | Marrow Blast Description                        | Response Definition <sup>a</sup>                                                                                                                                                                                           | Factors Adjusted for in Multivariate Analysis | Responder Status | Outcome Unit of Measurement | Outcome | <i>p</i> Value, Significance     |
|--------------------------|-----------------------------------------------------------------------------------------------------------------------------------------------------------------------|----------|-------------------------------------------------|----------------------------------------------------------------------------------------------------------------------------------------------------------------------------------------------------------------------------|-----------------------------------------------|------------------|-----------------------------|---------|----------------------------------|
| 1997 [26]                | (in first study cohort), 30-75–150 µg/d SC (in second study cohort) and EPO: 60-120 U/kg/d SC (in first study cohort) and 5000–10,000 U/d SC (in second study cohort) | 57       |                                                 | g/dL or 100% reduction of RBC transfusion need in combination with stable Hb level for >6 weeks on study                                                                                                                   |                                               | Non-responders   |                             | 74 (23) |                                  |
| Isnard et al., 1994 [23] | rhEPO, TIW, 40 U/kg/day with a progressive increase to 300 U/kg/day                                                                                                   | 7        | Bone marrow erythroblasts before treatment <25% | CR defined by the correction of anemia, and PR as durable rise in Hb concentration of >1.5 g/dL and/or durable reduction of 50% in transfusion needs during the 3 months of treatment compared to pre-study 3-month period | NA                                            | Responders       | Median (range)              | 2 (NR)  | <i>p</i> = 0.17, non-significant |
|                          |                                                                                                                                                                       | 13       |                                                 |                                                                                                                                                                                                                            |                                               | Non-responders   |                             | 8 (NR)  |                                  |
|                          |                                                                                                                                                                       | 7        | Bone marrow erythroblasts before treatment >25% |                                                                                                                                                                                                                            |                                               | Responders       |                             | 5 (NR)  |                                  |
|                          |                                                                                                                                                                       | 13       |                                                 |                                                                                                                                                                                                                            |                                               | Non-responders   |                             | 5 (NR)  |                                  |
| Moura et al., 2019 [51]  | Epoetin-α, weekly, 30,000–60,000 IU                                                                                                                                   | 26       | % Bone marrow blasts ≤2%                        | IWG 2006 MDS criteria                                                                                                                                                                                                      | NA                                            | Responders       | <i>N</i>                    | 25      | <i>p</i> < 0.0001, significant   |
|                          |                                                                                                                                                                       |          | Non-responders                                  |                                                                                                                                                                                                                            |                                               | 1                |                             |         |                                  |
|                          |                                                                                                                                                                       | 4        |                                                 |                                                                                                                                                                                                                            |                                               | Responders       |                             | 3       |                                  |

| Author, Year            | Intervention                          | N                         | Marrow Blast Description   | Response Definition <sup>a</sup> | Factors Adjusted for in Multivariate Analysis | Responder Status                                                                                                                                                                    | Outcome Unit of Measurement | Outcome                   | p Value, Significance     |          |                       |
|-------------------------|---------------------------------------|---------------------------|----------------------------|----------------------------------|-----------------------------------------------|-------------------------------------------------------------------------------------------------------------------------------------------------------------------------------------|-----------------------------|---------------------------|---------------------------|----------|-----------------------|
|                         |                                       | 3                         | % Bone marrow blasts >2–5% |                                  |                                               | Non-responders                                                                                                                                                                      |                             | 1                         |                           |          |                       |
|                         |                                       |                           | % Bone marrow blasts 5–10% |                                  |                                               | Responders                                                                                                                                                                          |                             | 1                         |                           |          |                       |
|                         |                                       | 3                         | % Bone marrow blasts >10%  |                                  |                                               | Non-responders                                                                                                                                                                      |                             | 2                         |                           |          |                       |
|                         |                                       |                           |                            |                                  |                                               | Responders                                                                                                                                                                          |                             | 0                         |                           |          |                       |
|                         |                                       |                           |                            |                                  |                                               | Non-responders                                                                                                                                                                      |                             | 3                         |                           |          |                       |
|                         |                                       |                           |                            |                                  |                                               | Responders                                                                                                                                                                          |                             |                           |                           |          |                       |
| Muniz et al., 2019 [53] | ESAs (not specified)                  | 26<br>42                  | % Blasts                   | IWG MDS criteria <sup>b</sup>    | NA                                            | Responders<br>Non-responders                                                                                                                                                        | Median (range)              | 0.89 (0–5)<br>0.92 (0–10) | p = 0.96, non-significant |          |                       |
| Musto et al., 2005 [32] | DPO- $\alpha$ , , weekly, 150 $\mu$ g | 15<br>22                  | <5% Marrow blasts          | IWG 2000 MDS criteria            | NA                                            | Responders<br>Non-responders                                                                                                                                                        | N (%)                       | 14 (93.3%)<br>7 (31.8%)   | p < 0.0002, significant   |          |                       |
|                         |                                       | Westers et al., 2010 [38] |                            |                                  |                                               | Epoetin started at 30,000 IU QW. In absence of increase in Hb of $\geq$ 1 g/dL (0.62 mM) within 6 weeks, epoetin dose was escalated to 60,000 IU according to Hellström-Lindberg et |                             | 18<br>28                  |                           | % Blasts | IWG 2006 MDS criteria |

| Author,<br>Year | Intervention          | <i>N</i> | Marrow<br>Blast<br>Description | Response<br>Definition <sup>a</sup> | Factors Adjusted for in<br>Multivariate Analysis | Responder<br>Status | Outcome<br>Unit of<br>Measureme<br>nt | Outcome | <i>p</i> Value,<br>Significance |
|-----------------|-----------------------|----------|--------------------------------|-------------------------------------|--------------------------------------------------|---------------------|---------------------------------------|---------|---------------------------------|
|                 | al., [63] + G-<br>CSF |          |                                |                                     |                                                  |                     |                                       |         |                                 |

Abbreviations: BIW = twice per week; CR = complete response; DPO = darbepoetin; EPO = erythropoietin; ESA = erythropoiesis-stimulating agent; G-CSF = granulocyte colony-stimulating factor; Hb = hemoglobin; Int = Intermediate; IPSS = International Prognostic Scoring System; IQR = interquartile range; IWG = International Working Group; MDS = myelodysplastic syndromes; NA = not applicable; NR = not reported; PR = partial response; QW, weekly; RBC, red blood cell; REF=reference; rhEPO = recombinant human erythropoietin; SC = subcutaneous; SD = standard deviation; TIW = three times per week; WHO = World Health Organization.

**Bolded results are from multivariate analyses.**

<sup>a</sup>References for response criteria: IWG 2000 [60]; IWG 2006 [12].

<sup>b</sup>IWG criteria used unclear.

**Table S5.** Quantitative associations of ferritin level and response to ESA.

| Author, Year                 | Intervention                                                                                                                             | ESA-Treated Sample Size | Ferritin Level Information                        | Response Definition <sup>a</sup> | Effect Measure: Value (95% CI) | Is the Result Significant? | Factors Adjusted for in Multivariate Analysis | Author Interpretation of Results                                                                                                                                                                                                                                                                                                                                                                                                             |
|------------------------------|------------------------------------------------------------------------------------------------------------------------------------------|-------------------------|---------------------------------------------------|----------------------------------|--------------------------------|----------------------------|-----------------------------------------------|----------------------------------------------------------------------------------------------------------------------------------------------------------------------------------------------------------------------------------------------------------------------------------------------------------------------------------------------------------------------------------------------------------------------------------------------|
| Buckstein et al., 2017 [47]  | ESAs (mixed), EPO 40,000 IU/week or DPO 300–500 µg Q2–3 weeks, for minimum 12 weeks                                                      | 996                     | Ferritin level at pre-initiation (log)            | IWG 2006 MDS criteria            | OR: 0.8 (CI: NR); $p = 0.0195$ | Significant                | NA                                            | Responders were more likely to be transfusion independent (66% vs. 33%; $p < 0.0001$ ) and to have lower endogenous EPO levels (44 vs. 98 U/L; $p < 0.0001$ ) and ferritins (253 vs. 358 µg/L; $p < 0.0001$ )                                                                                                                                                                                                                                |
|                              |                                                                                                                                          |                         | Ferritin at pre-initiation (>1000 vs. ≤1000 ug/L) |                                  | OR: 0.51 (CI: NR); $p = 0.08$  | Non-significant            | NA                                            |                                                                                                                                                                                                                                                                                                                                                                                                                                              |
| Houston et al., 2017 [48]    | ESAs (not specified)                                                                                                                     | 208                     | Ferritin levels                                   | IWG 2006 MDS criteria            | OR: 0.8 (CI: NR); $p = 0.15$   | Non-significant            | NA                                            | We hypothesized that baseline LDH and ferritin values, both of which are markers of ineffective erythropoiesis, would be elevated in non-responders, and would differentially decline in responders. However, we were unable to appreciate a significant difference between baseline values according to response, nor significant changes in their levels at 3 months, possibly due to the small sample size and limited follow-up interval |
| Latagliata et al., 2008 [35] | rhEPO, BIW, 40,000 IU. QW, dosing reduction was considered for patients with Hb increase ≥2 g/dL within the first 2 weeks of therapy and | 60                      | Ferritin levels                                   | IWG 2000 MDS criteria            | HR: 1 (CI: 1–1); $p = 0.845$   | Non-significant            | NA                                            | In univariate analysis, factors associated with response were transfusion dependence ( $p = 0.006$ ), serum EPO levels ( $p = 0.046$ ), baseline Hb levels ( $p = 0.003$ ), and cytogenetics (normal karyotype vs. abnormal karyotype; $p = 0.032$ )                                                                                                                                                                                         |

| Author, Year                | Intervention                                                                                                                       | ESA-Treated Sample Size | Ferritin Level Information | Response Definition <sup>a</sup> | Effect Measure: Value (95% CI)                    | Is the Result Significant? | Factors Adjusted for in Multivariate Analysis                                                                                                           | Author Interpretation of Results                                                                                                                                                                                                                                                                                                       |
|-----------------------------|------------------------------------------------------------------------------------------------------------------------------------|-------------------------|----------------------------|----------------------------------|---------------------------------------------------|----------------------------|---------------------------------------------------------------------------------------------------------------------------------------------------------|----------------------------------------------------------------------------------------------------------------------------------------------------------------------------------------------------------------------------------------------------------------------------------------------------------------------------------------|
|                             | in patients reaching Hb = 12 g/dL at any time in the study                                                                         |                         |                            |                                  |                                                   |                            |                                                                                                                                                         |                                                                                                                                                                                                                                                                                                                                        |
| Park et al., 2010 [39]      | ESAs (mixed), weekly, epoetin- $\alpha$ or - $\beta$ : 60,000 U; DPO: 300 $\mu$ g                                                  | 67                      | Ferritin level <400 ng/mL  | IWG 2006 MDS criteria            | 67% responders, OR: 1.19 (CI: 0.5–2.8); $p = 0.4$ | Non-significant            | NA                                                                                                                                                      | Age, gender, WHO diagnosis, karyotype, multilineage dysplasia, percentage of bone marrow blasts, IPSS score, Hb level, ferritin level, type of ESA, and addition of G-CSF had no significant influence on response                                                                                                                     |
|                             |                                                                                                                                    | 78                      | Ferritin level >400 ng/mL  |                                  | 78% responders, OR: 1 (CI: NR); $p = \text{NR}$   | NR                         | NA                                                                                                                                                      |                                                                                                                                                                                                                                                                                                                                        |
| Tatarelli et al., 2014 [44] | Standard dose: epoetin- $\alpha$ 40,000 IU/week or epoetin- $\beta$ 30,000 IU/week, or high dose: epoetin- $\alpha$ 80,000 IU/week | 59                      | Ferritin level <200 ng/mL  | IWG 2006 MDS criteria            | OR: 4.42 (CI: 1.3–15.1); $p = 0.017$              | Significant                | Hb, hematocrit, ferritin, type of rhEPO received, starting rhEPO dose, number of RBC units received 2 months prior to treatment, transfusion dependence | At the multivariate analysis based on a logistic regression model, independent predictive factors for Hb level >8 g/dL, <2 RBC units 2 months before treatment, and ferritin level <200 ng/mL; high-dose rhEPO treatment (80,000 IU/week) and epoetin- $\alpha$ type treatment were also predictive factors for ER in elderly patients |

Abbreviations: BIW = twice per week; CI = confidence interval; DPO = darbepoetin; EPO = erythropoietin; ER = erythroid response; ESA = erythropoiesis-stimulating agent; G-CSF = granulocyte colony-stimulating factor; Hb = hemoglobin; HR = hazard ratio; IPSS = International Prognostic Scoring System; IWG = International Working Group; LDH = lactate dehydrogenase; MDS = myelodysplastic syndromes; NA = not available; NR = not reported; OR = odds ratio; QW = once weekly; RBC = red blood cell; rhEPO = recombinant human erythropoietin; WHO = World Health Organization.

**Bolded results are from multivariate analyses.**

<sup>a</sup>References for response criteria: IWG 2000 [60]; IWG 2006 [12].

**Table S6.** Studies comparing ferritin level as a prognostic factor for response vs. non-response to ESA treatment.

| Author, Year                          | Intervention                                                        | N   | Ferritin Level Description          | Response Definition                                                                                                                                                                                                          | Factors Adjusted for in Multivariate Analysis                                                                                                                                                                                                                                                  | Responder Status | Outcome Unit of Measurement | Outcome        | p Value, Significance        |
|---------------------------------------|---------------------------------------------------------------------|-----|-------------------------------------|------------------------------------------------------------------------------------------------------------------------------------------------------------------------------------------------------------------------------|------------------------------------------------------------------------------------------------------------------------------------------------------------------------------------------------------------------------------------------------------------------------------------------------|------------------|-----------------------------|----------------|------------------------------|
| Balleari et al., 2019 [54]            | rhEPO, QW/BIW, 40,000 IU                                            | 148 | Ferritin $\leq 350$ $\mu\text{g/L}$ | Hematological improvement according to IWG 2006 criteria                                                                                                                                                                     | Age, MDS WHO 2008 classification, bone marrow blasts ( $<5\%$ vs. $\geq 5\%$ ), endogenous EPO ( $>200$ vs. $\leq 200$ mU/mL), transfusion dependency (yes vs. no), Hb ( $>8$ vs. $\leq 8$ g/dL), ferritin ( $>350$ vs. $\leq 350$ $\mu\text{g/L}$ ), and IPSS score (Int-1 or higher vs. low) | Responders       | N (%)                       | 76 (53.5%)     | $p = 0.82$ , non-significant |
|                                       |                                                                     | 164 |                                     |                                                                                                                                                                                                                              |                                                                                                                                                                                                                                                                                                | Non-responders   |                             | 66 (46.5%)     | NA                           |
|                                       |                                                                     | 148 | Ferritin $>350$ $\mu\text{g/L}$     |                                                                                                                                                                                                                              |                                                                                                                                                                                                                                                                                                | Responders       |                             | 88 (51.8%)     | REF                          |
|                                       |                                                                     | 164 |                                     |                                                                                                                                                                                                                              |                                                                                                                                                                                                                                                                                                | Non-responders   |                             | 82 (48.2%)     | NA                           |
| Hattakitpanitchakul et al., 2021 [59] | ESAs (not specified)                                                | 22  | Ferritin levels                     | IWG 2006 MDS criteria                                                                                                                                                                                                        | NA                                                                                                                                                                                                                                                                                             | Responders       | Median (IQR)                | 771 (239–1773) | $p = 0.53$ , non-significant |
|                                       |                                                                     | 25  |                                     |                                                                                                                                                                                                                              |                                                                                                                                                                                                                                                                                                | Non-responders   |                             | 820 (325–1157) |                              |
| Isnard et al., 1994 [23]              | rhEPO, TIW, 40 U/kg/day with a progressive increase to 300 U/kg/day | 7   | Ferritin levels                     | CR defined by the correction of anemia, and PR as durable rise in Hb concentration of $>1.5$ g/dL and/or durable reduction of 50% in transfusion needs during the 3 months of treatment compared to pre-study 3-month period | NA                                                                                                                                                                                                                                                                                             | Responders       | Median (range)              | 9.4 (7.5–10.2) | $p > 0.05$ , non-significant |
|                                       |                                                                     | 13  |                                     |                                                                                                                                                                                                                              |                                                                                                                                                                                                                                                                                                | Non-responders   |                             | 8.4 (7.2–9.8)  |                              |
| Muniz et al., 2019 [53]               | ESAs (not specified)                                                | 68  | Ferritin levels                     | IWG MDS criteria <sup>b</sup>                                                                                                                                                                                                | NA                                                                                                                                                                                                                                                                                             | Responders       | Median (range)              | 249 (8.2–649)  | $p = 0.02$ , significant     |
|                                       |                                                                     |     |                                     |                                                                                                                                                                                                                              |                                                                                                                                                                                                                                                                                                | Non-responders   |                             | 395 (9.3–945)  |                              |

| Author, Year             | Intervention                                                                                                                                                                                                                                              | N   | Ferritin Level Description | Response Definition                                                                                                                                                                                                                                                                       | Factors Adjusted for in Multivariate Analysis | Responder Status | Outcome Unit of Measurement | Outcome        | p Value, Significance             |
|--------------------------|-----------------------------------------------------------------------------------------------------------------------------------------------------------------------------------------------------------------------------------------------------------|-----|----------------------------|-------------------------------------------------------------------------------------------------------------------------------------------------------------------------------------------------------------------------------------------------------------------------------------------|-----------------------------------------------|------------------|-----------------------------|----------------|-----------------------------------|
| Park et al., 2019 [49]   | Epoetin-Z, 40,000 IU/week for 12 weeks. If Hb levels exceeded 12 g/dL at any time before week 12, the dose of epoetin-Z was reduced to 20,000 IU/week. After week 12, intervals between injections were increased by 1 week if Hb levels exceeded 13 g/dL | 33  | Ferritin levels            | IWG 2006 MDS criteria                                                                                                                                                                                                                                                                     | NA                                            | Responders       | Mean                        | 613            | $p = 0.62$ , non-significant      |
|                          |                                                                                                                                                                                                                                                           | 37  |                            |                                                                                                                                                                                                                                                                                           |                                               | Non-responders   |                             | 618            |                                   |
| Rosati et al., 2019 [55] | EPO- $\alpha$ , weekly, 80,000 IU                                                                                                                                                                                                                         | 103 | Ferritin levels            | IWG 2006 MDS criteria                                                                                                                                                                                                                                                                     | NA                                            | Responders       | NR                          | NR             | $p = 0.049$ , significant         |
| Stasi et al., 1999 [27]  | DPO- $\alpha$ , weekly, 150 $\mu$ g fixed dose,                                                                                                                                                                                                           | 9   | Ferritin levels            | Erythroid responses categorized as GR, PR, or no response. GR: a rise in untransfused Hb concentrations of $\geq 2$ g/dL or a 100% decrease in RBC transfusion requirements over the treatment period. PR: an increase in untransfused Hb values of 1–2 g/dL or a $>50\%$ decrease in RBC | NA                                            | Responders       | Median (range)              | 608 (178–1273) | $p = \text{NR}$ , non-significant |
|                          | increased to 300 mg fixed dose if after 12 weeks there was no or suboptimal ER                                                                                                                                                                            | 17  |                            |                                                                                                                                                                                                                                                                                           |                                               | Non-responders   |                             | 671 (218–1452) |                                   |



| Author,<br>Year                      | Intervention                                                                                                                                   | N              | Ferritin<br>Level<br>Description | Response Definition                                                                    | Factors Adjusted<br>for in Multivariate<br>Analysis | Responder<br>Status                    | Outcome<br>Unit of<br>Measureme<br>nt | Outcome                            | p Value,<br>Significan<br>ce |
|--------------------------------------|------------------------------------------------------------------------------------------------------------------------------------------------|----------------|----------------------------------|----------------------------------------------------------------------------------------|-----------------------------------------------------|----------------------------------------|---------------------------------------|------------------------------------|------------------------------|
|                                      |                                                                                                                                                |                |                                  | transfusion requirements.<br>No response was defined<br>as responses less than a<br>PR |                                                     |                                        |                                       |                                    |                              |
| Tatarelli<br>et al.,<br>2014<br>[44] | Epoetin- $\alpha$<br>40,000<br>IU/week or<br>epoetin- $\beta$<br>30,000<br>IU/week, or<br>high dose:<br>epoetin- $\alpha$<br>80,000<br>IU/week | 59<br><hr/> 34 | Ferritin<br>levels               | IWG 2006 MDS criteria                                                                  | NA                                                  | Responders<br><hr/> Non-<br>responders | Median<br>(range)                     | 178 (15–766)<br><hr/> 316 (12–890) | $p = 0.001$ ,<br>significant |

Abbreviations: BIW = twice per week; CR = complete response; DPO = darbepoetin; EPO = erythropoietin; ER = erythroid response; ESA = erythropoiesis-stimulating agent; GR = good response; Hb = hemoglobin; Int = Intermediate; IPSS = International Prognostic Scoring System; IQR = interquartile range; IWG = International Working Group; MDS = myelodysplastic syndromes; NA = not applicable; NR = not reported; PR = partial response; QW = once weekly; RBC = red blood cell; REF=reference; rhEPO = recombinant human EPO; TIW = three times per week; WHO = World Health Organization.

**Bolded results are from multivariate analyses.**

<sup>a</sup>References for response criteria: IWG 2000 [60]; IWG 2006 [12].

<sup>b</sup>IWG criteria used unclear.

**Table S7.** Quantitative associations of Hb level and response to ESA.

| Author, Year                 | Intervention                                                                                                                                                                                        | ESA-Treated Sample Size | Hb Level Information                              | Response Definition <sup>a</sup> | Effect Measure: Value (95% CI)                                                                       | Is the Result Significant? | Factors Adjusted for in Multivariate Analyses | Author Interpretation of Results                                                                                                                                                                                                                                                                                                                                                                                                                                     |
|------------------------------|-----------------------------------------------------------------------------------------------------------------------------------------------------------------------------------------------------|-------------------------|---------------------------------------------------|----------------------------------|------------------------------------------------------------------------------------------------------|----------------------------|-----------------------------------------------|----------------------------------------------------------------------------------------------------------------------------------------------------------------------------------------------------------------------------------------------------------------------------------------------------------------------------------------------------------------------------------------------------------------------------------------------------------------------|
| Buckstein et al., 2017 [47]  | ESAs (mixed), EPO 40,000 IU/week or DPO 300–500 µg Q2–3 weeks, for minimum 12 weeks                                                                                                                 | 548                     | Hb pre-ESA initiation values                      | IWG 2006 MDS criteria            | OR: 1.03 (CI: NR); $p = 0.0018$                                                                      | Significant                | NA                                            | By univariate analysis, the Nordic, IPSS-R based, and MDS-CAN predictive scores demonstrated stratified response rates that were statistically different                                                                                                                                                                                                                                                                                                             |
|                              |                                                                                                                                                                                                     |                         | Hb pre-ESA initiation values (<100 vs. ≥100 g/dL) |                                  | OR: 0.65 (CI: NR); $p = 0.11$                                                                        | Non-significant            | NA                                            |                                                                                                                                                                                                                                                                                                                                                                                                                                                                      |
| Houston et al., 2017 [48]    | EPO 40,000–60,000 IU/week or DPO 300–500 µg Q2–3 weeks                                                                                                                                              | 208                     | Hb (g/L)                                          | IWG 2006 MDS criteria            | OR: 1.1 (CI: NR); $p = 0.002$                                                                        | Significant                | NA                                            | Lower-risk IPSS and IPSS-R category, bone marrow blasts <5%, higher baseline Hb, higher Nordic score, lower European ESA score, lower EPO level, transfusion independence, and absence of G-CSF use were significantly associated with ESA response                                                                                                                                                                                                                  |
| Latagliata et al., 2008 [35] | rhEPO, BIW, 40,000 IU. QW, dosing reduction was considered for patients with Hb increase ≥2 g/dL within the first 2 weeks of therapy and in patients reaching Hb = 12 g/dL at any time in the study | 60                      | Hb (g/L)                                          | IWG 2000 MDS criteria            | HR: 1.845 (CI: 1.235–2.756); $p = 0.003$                                                             | Significant                | NA                                            | In univariate analysis, factors associated with response were transfusion dependence ( $p = 0.006$ ), serum EPO levels ( $p = 0.046$ ), baseline Hb levels ( $p = 0.003$ ), and cytogenetics (normal karyotype vs. abnormal karyotype; $p = 0.032$ ). All these factors maintained their significance in multivariate analysis. In particular, in logistic regression analysis, in transfusion-free patients, for each 1 g/dL increase in the baseline Hb level, the |
|                              |                                                                                                                                                                                                     |                         | Hb levels and probability of response             |                                  | For each 1 g/dL increase in baseline Hb, the probability of response increased by 98% ( $p = 0.02$ ) | Significant                | NR                                            |                                                                                                                                                                                                                                                                                                                                                                                                                                                                      |

| Author, Year                | Intervention                                                                                                        | ESA-Treated Sample Size | Hb Level Information | Response Definition <sup>a</sup> | Effect Measure: Value (95% CI)                           | Is the Result Significant? | Factors Adjusted for in Multivariate Analyses                                                                                                           | Author Interpretation of Results                                                                                                                                                                                                                                                                                                                                                                                                                              |  |
|-----------------------------|---------------------------------------------------------------------------------------------------------------------|-------------------------|----------------------|----------------------------------|----------------------------------------------------------|----------------------------|---------------------------------------------------------------------------------------------------------------------------------------------------------|---------------------------------------------------------------------------------------------------------------------------------------------------------------------------------------------------------------------------------------------------------------------------------------------------------------------------------------------------------------------------------------------------------------------------------------------------------------|--|
|                             |                                                                                                                     |                         |                      |                                  |                                                          |                            |                                                                                                                                                         | probability of response increased by 98%                                                                                                                                                                                                                                                                                                                                                                                                                      |  |
| Park et al., 2010 [39]      | ESAs (mixed), weekly, epoetin- $\alpha$ or - $\beta$ : 60,000 IU; DPO: 300 $\mu$ g                                  | 112                     | Hb level <9 g/dL     | IWG 2006 MDS criteria            | $N = 38$ vs. $N = 74$ , OR: 1.7 (CI: 0.7–4.7); $p = 0.2$ | Non-significant            | NA                                                                                                                                                      | In univariate analysis, using IWG 2006 criteria, age, gender, WHO diagnosis, karyotype, multilineage dysplasia, % of bone marrow blasts, IPSS, Hb level, ferritin level, type of ESA, and addition of G-CSF had no significant influence on response. In multivariate analysis, interval from diagnosis to onset of ESA of <6 months ( $p = 0.01$ ), Hb level >9 g/dL ( $p = 0.04$ ), and serum EPO <100 IU/L ( $p = 0.02$ ) predicted better response to ESA |  |
|                             |                                                                                                                     |                         | Hb level >9 g/dL     |                                  |                                                          |                            | NA                                                                                                                                                      |                                                                                                                                                                                                                                                                                                                                                                                                                                                               |  |
|                             |                                                                                                                     |                         | Hb level <9 g/dL     |                                  | $N = 38$ vs. $N = 74$ , OR: 1 (CI: NR); $p = 0.04$       | Significant                | Bone marrow blasts %, serum EPO level, Hb level, time to ESA onset                                                                                      |                                                                                                                                                                                                                                                                                                                                                                                                                                                               |  |
|                             |                                                                                                                     |                         | Hb level >9 g/dL     |                                  |                                                          |                            |                                                                                                                                                         |                                                                                                                                                                                                                                                                                                                                                                                                                                                               |  |
| Tatarelli et al., 2014 [44] | Epoetin- $\alpha$ 40,000 IU/week or epoetin- $\beta$ 30,000 IU/week, or high dose: epoetin- $\alpha$ 80,000 IU/week | 59                      | Hb level >8 g/dL     | IWG 2006 MDS criteria            | $N = 93$ , OR: 4.42 (1.12–17.45); $p = 0.034$            | Significant                | Hb, hematocrit, ferritin, type of rhEPO received, starting rhEPO dose, number of RBC units received 2 months prior to treatment, transfusion dependence | At the multivariate analysis based on a logistic regression model, independent predictive factors for Hb level >8 g/dL, less than two RBC units 2 months before treatment, and ferritin level <200 ng/mL; high-dose rhEPO treatment (80,000 IU/week) and epoetin- $\alpha$ type treatment were also predictive factors for ER in elderly patients                                                                                                             |  |

Abbreviations: BIW = twice per week; CI = confidence interval; DPO = darbepoetin; EPO = erythropoietin; ER = erythroid response; ESA = erythropoiesis-stimulating agent; G-CSF = granulocyte colony-stimulating factor; Hb = hemoglobin; IPSS = International Prognostic Scoring System; IPSS-R = Revised IPSS; IWG = International Working Group; MDS = myelodysplastic syndromes; MDS-CAN = Myelodysplastic Syndromes Registry of Canada; NA = not available; NR = not reported; OR = odds ratio; QW = once weekly; RBC = red blood cell; rhEPO = recombinant human EPO; WHO = World Health Organization.

**Bolded results are from multivariate analyses.**

<sup>a</sup>References for response criteria: IWG 2000 [60]; IWG 2006 [12].

**Table S8.** Studies comparing Hb level as a prognostic factor for response vs. non-response to ESA treatment.

| Author, Year                           | Intervention                                                                                                                                                                                                                          | N   | Hb Level Description | Response Definition                                                                                                                                                         | Responder Status | Outcome Unit of Measurement | Outcome        | p Value, Significance          |
|----------------------------------------|---------------------------------------------------------------------------------------------------------------------------------------------------------------------------------------------------------------------------------------|-----|----------------------|-----------------------------------------------------------------------------------------------------------------------------------------------------------------------------|------------------|-----------------------------|----------------|--------------------------------|
| Antelo et al., 2019 [52]               | EPO- $\alpha$ , DPO, or EPO- $\alpha$ and DPO                                                                                                                                                                                         | 16  | Hb levels, g/dL      | IWG MDS 2006 and the IWG MDS/MPN 2015 [62] response criteria                                                                                                                | Responder        | Median (range)              | 9.6 (7.7–10.9) | $p = 0.4654$ , non-significant |
|                                        |                                                                                                                                                                                                                                       | 19  |                      |                                                                                                                                                                             | Non-responder    |                             | 9 (6.6–12.1)   |                                |
| Castelli et al., 2014 [45]             | Biosimilar epoetin- $\alpha$ , 40,000 IU, weekly, for minimum 12 weeks                                                                                                                                                                | 16  | Hb levels, g/dL      | IWG 2006 MDS criteria                                                                                                                                                       | Responders       | Median                      | 8.6            | NR                             |
|                                        |                                                                                                                                                                                                                                       | 7   |                      |                                                                                                                                                                             | Non-responders   |                             | 7.95           |                                |
| Frisan et al., 2010 [40]               | Epoetin- $\alpha$ or - $\beta$ 60,000 IU weekly. DPO- $\alpha$ 300 $\mu$ g weekly $\pm$ G-CSF                                                                                                                                         | 127 | Hb levels, g/dL      | IWG 2006 MDS criteria                                                                                                                                                       | Responders       | Median (IQR)                | 9.9 (9.3–10.4) | $p = 0.184$ , non-significant  |
| Hattakitpa nitchakul et al., 2021 [59] | ESAs (not specified)                                                                                                                                                                                                                  | 22  | Hb levels, g/dL      | IWG 2006 MDS criteria                                                                                                                                                       | Responders       | Median (IQR)                | 8.5 (7.3–9)    | $p = 0.52$ , non-significant   |
|                                        |                                                                                                                                                                                                                                       | 25  |                      |                                                                                                                                                                             | Non-responders   |                             | 8 (7.4–8.8)    |                                |
| Hellström-Lindberg et al., 1997 [26]   | ESAs (mixed), SC, weekly, G-CSF 0.3–1.0–3.0 $\mu$ g/kg/day (in first study cohort), 30–75–150 $\mu$ g/d SC (in second study cohort) and EPO: 60–120 U/kg/d SC (in first study cohort) and 5000–10,000 U/d SC (in second study cohort) | 41  | Hb levels, g/dL      | CR = increase in Hb to >11.5 g/dL; and PR = increase in Hb of >1.5 g/dL or 100% reduction of RBC transfusion need in combination with stable Hb level for >6 weeks on study | Responders       | Mean (SD)                   | 9.06 (1.01)    | $p = 0.001$ , significant      |
|                                        |                                                                                                                                                                                                                                       | 57  |                      |                                                                                                                                                                             | Non-responders   |                             | 8.41 (1.30)    |                                |
| Isnard et al., 1994 [23]               | rhEPO, TIW, 40 U/kg/day with a progressive increase to 300 U/kg/day                                                                                                                                                                   | 7   | Hb levels, g/dL      | CR defined by the correction of anemia, and PR as durable rise in Hb concentration of >1.5 g/dL and/or a durable reduction of 50% in the transfusion                        | Responders       | Median (range)              | 9.4 (7.5–10.2) | $p > 0.05$ , significant       |

| Author, Year             | Intervention                                                                                                                                                                                                                                              | N   | Hb Level Description | Response Definition                                                         | Responder Status             | Outcome Unit of Measurement | Outcome                      | p Value, Significance         |
|--------------------------|-----------------------------------------------------------------------------------------------------------------------------------------------------------------------------------------------------------------------------------------------------------|-----|----------------------|-----------------------------------------------------------------------------|------------------------------|-----------------------------|------------------------------|-------------------------------|
|                          |                                                                                                                                                                                                                                                           | 13  |                      | needs during the 3 months of treatment compared to pre-study 3-month period | Non-responders               |                             | 8.4 (7.2–9.8)                |                               |
| Muniz et al., 2019 [53]  | ESAs (not specified)                                                                                                                                                                                                                                      | 68  | Hb levels, g/dL      | IWG MDS criteria <sup>b</sup>                                               | Responders<br>Non-responders | Median (range)              | 9.4 (8–11.1)<br>8.9 (5.3–13) | p = 0.24; non-significant     |
|                          | Epoetin-Z, 40,000 IU/week for 12 weeks. If Hb levels exceeded 12 g/dL at any time before week 12, the dose of epoetin-Z was reduced to 20,000 IU/week. After week 12, intervals between injections were increased by 1 week if Hb levels exceeded 13 g/dL | 33  |                      |                                                                             | Responders                   |                             | NR                           |                               |
| Park et al., 2019 [49]   |                                                                                                                                                                                                                                                           | 37  | Hb levels, g/dL      | IWG 2006 MDS criteria                                                       | Non-responders               | Mean                        | NR                           | p = 0.37, non-significant     |
| Rosati et al., 2019 [55] | EPO- $\alpha$ , weekly, 80,000 IU                                                                                                                                                                                                                         | 103 | Hb level, >8 g/dL    | IWG 2006 MDS criteria                                                       | Responders                   | NR                          | NR                           | p = 0.001, significant        |
|                          | ATRA + rhEPO, TIW, 150–300 U/kg. EPO dose was initiated at 150 U/kg and was increased to 300 U/kg if after 6 weeks there was no or suboptimal ER                                                                                                          | 13  |                      |                                                                             | Responders                   |                             | 7.9 (6.7–9.3)                |                               |
| Stasi et al., 2002 [29]  |                                                                                                                                                                                                                                                           | 14  | Hb levels, g/dL      | NR                                                                          | Non-responders               | Median (range)              | 8.1 (6.1–9.5)                | p = 0.884009, non-significant |
|                          | rhEPO, weekly, 40,000 IU. rhEPO dose was increased to 60,000 IU fixed dose if after 6 weeks there was no or suboptimal ER                                                                                                                                 | 13  |                      |                                                                             | Responders                   |                             | 7.8 (6.8–8.3)                |                               |
| Stasi et al., 2004 [31]  |                                                                                                                                                                                                                                                           | 35  | Hb levels, g/dL      | IWG 2000 MDS criteria                                                       | Non-responders               | Median (range)              | 8.1 (6.6–8.9)                | p = 0.126828, non-significant |

| Author, Year                | Intervention                                                                                                                   | N        | Hb Level Description | Response Definition   | Responder Status             | Outcome Unit of Measurement | Outcome                        | p Value, Significance         |
|-----------------------------|--------------------------------------------------------------------------------------------------------------------------------|----------|----------------------|-----------------------|------------------------------|-----------------------------|--------------------------------|-------------------------------|
| Stasi et al., 2005 [33]     | DPO- $\alpha$ , weekly, 150 $\mu$ g fixed dose, increased to 300 mg fixed dose if after 12 weeks there was no or suboptimal ER | 53       | Hb levels, g/dL      | IWG 2000 MDS criteria | Responders<br>Non-responders | Median (range)              | 8.0 (6.8–9.3)<br>7.7 (6.9–9.6) | $p = 0.156$ , non-significant |
| Tatarelli et al., 2014 [44] | Epoetin- $\alpha$ 40,000 IU/week or epoetin- $\beta$ 30,000 IU/week, or high dose: epoetin- $\alpha$ 80,000 IU/week            | 93       | Hb levels, g/dL      | IWG 2006 MDS criteria | Responders<br>Non-responders | Median                      | 9.2<br>8.6                     | $p = 0.003$ , significant     |
| Westers et al., 2010 [38]   | Epoetin- $\beta$ , weekly, 30,000–60,000 UI + G-CSF                                                                            | 18<br>28 | Hb levels, g/dL      | IWG 2006 MDS criteria | Responders<br>Non-responders | Median (range)              | 5.9 (4.8–6.3)<br>5.1 (4.1–6.6) | $p = 0.001$ , significant     |

Abbreviations: ATRA = all-trans retinoic acid; CR = complete response; DPO = darbepoetin; ER = erythroid response; ESA = erythropoiesis-stimulating agent; G-CSF = granulocyte colony-stimulating factor; Hb = hemoglobin; IQR = interquartile range; IWG = International Working Group; MDS = myelodysplastic syndromes; MPN = myeloproliferative neoplasm; NR = not reported; PR = partial response; RBC = red blood cell; rhEPO = recombinant human erythropoietin; SC = subcutaneous; SD = standard deviation; TIW = three times per week.

<sup>a</sup>References for response criteria: IWG 2000 [60]; IWG 2006 [12]; IWG MDS/MPN 2015 [62].

<sup>b</sup>IWG criteria used unclear.

**Table S9.** Quantitative associations of IPSS risk status and response to ESA.

| Author, Year                | Intervention                                                                         | ESA-treated Sample Size | IPSS Information                 | Response Definition <sup>a</sup> | Effect Measure                                                          | Is the Result Significant? | Factors Adjusted for in Multivariate Analysis                                                                                  | Author Interpretation                                                                                                                                    |
|-----------------------------|--------------------------------------------------------------------------------------|-------------------------|----------------------------------|----------------------------------|-------------------------------------------------------------------------|----------------------------|--------------------------------------------------------------------------------------------------------------------------------|----------------------------------------------------------------------------------------------------------------------------------------------------------|
| Houston et al., 2017 [48]   | ESAs (not specified), weekly, EPO 40,000–60,000 IU/week or DPO 300–500 µg Q2–3 weeks | 208                     | IPSS score                       | IWG 2006 criteria                | OR: 0.1 (CI: NR); $p = 0.002$                                           | Significant                | Age, IPSS score, IPSS-R score, Hb, blasts%, Nordic score, transfusion status, serum EPO, European ESA score, G-CSF (yes or no) | Lower-risk IPSS and IPSS-R category, bone marrow was significantly associated with ESA response                                                          |
|                             |                                                                                      |                         | IPSS (Low vs. Int-1/Int-2)       |                                  | OR: 3 (CI: NR); $p = 0.01$                                              | Significant                |                                                                                                                                |                                                                                                                                                          |
| Buckstein et al., 2017 [47] | ESAs (mixed), EPO 40,000 IU/week or DPO 300–500 µg Q2–3 weeks, for minimum 12 weeks  | 996                     | IPSS risk group                  | IWG 2006 criteria                | NR (model fitting information $R^2$ (%): 3.88); $p = 0.03$              | Significant                | NA                                                                                                                             | By univariate analysis, the Nordic, IPSS-R based, and MDS-CAN predictive scores demonstrated stratified response rates that were statistically different |
|                             |                                                                                      |                         | IPSS risk group: Low vs. Int-1   |                                  | OR: 2.95 (CI: NR) (model fitting information $R^2$ (%): NA); $p = 0.03$ | Significant                | NA                                                                                                                             |                                                                                                                                                          |
|                             |                                                                                      |                         | IPSS risk group: Int-1 vs. Int-2 |                                  | OR: 1.38 (CI: NR) (model fitting information $R^2$ (%): NA); $p = 0.38$ | Non-significant            | NA                                                                                                                             |                                                                                                                                                          |
|                             |                                                                                      |                         | IPSS risk group: Low vs. Int-1   |                                  | OR: 2.14 (CI: NR) (model fitting information $R^2$ (%): NA); $p = 0.03$ | Significant                | NA                                                                                                                             |                                                                                                                                                          |
|                             |                                                                                      |                         | IPSS group (Low vs. Int-1/Int-2) |                                  | OR: 2.24 (CI: NR) (model fitting                                        | Significant                | NA                                                                                                                             |                                                                                                                                                          |



| Author, Year           | Intervention                                                                                                                                                                                                                                              | ESA-treated Sample Size | IPSS Information | Response Definition <sup>a</sup> | Effect Measure                                         | Is the Result Significant? | Factors Adjusted for in Multivariate Analysis | Author Interpretation                                                                                                                                                                                        |
|------------------------|-----------------------------------------------------------------------------------------------------------------------------------------------------------------------------------------------------------------------------------------------------------|-------------------------|------------------|----------------------------------|--------------------------------------------------------|----------------------------|-----------------------------------------------|--------------------------------------------------------------------------------------------------------------------------------------------------------------------------------------------------------------|
|                        |                                                                                                                                                                                                                                                           |                         |                  |                                  | information R <sup>2</sup> (%): 3.71);<br>$p < 0.0001$ |                            |                                               |                                                                                                                                                                                                              |
| Park et al., 2019 [49] | Epoetin-Z, 40,000 IU/week for 12 weeks. If Hb levels exceeded 12 g/dL at any time before week 12, the dose of epoetin-Z was reduced to 20,000 IU/week. After week 12, intervals between injections were increased by 1 week if Hb levels exceeded 13 g/dL | 70                      | IPSS             | IWG 2006 MDS criteria            | HR: 1.73 (CI: 0.9–3.33); $p = 0.09$                    | Non-significant            | NR                                            | In multivariate analysis, taking into account GDF-15 level, hepcidin:ferritin ratio, and IPSS classification, only GDF-15 level >2000 pg/mL and hepcidin:ferritin ratio $\leq 9$ predicted shorter response  |
| Park et al., 2010 [39] | ESAs (mixed), weekly, epoetin- $\alpha$ or - $\beta$ : 60,000 U; DPO: 300 $\mu$ g                                                                                                                                                                         | 112                     | IPSS Low         | IWG 2006 response criteria       | $N = 69$ , OR: 1.8 (CI: 0.7–4); $p = 0.3$              | Non-significant            | NA                                            | Age, gender, WHO diagnosis, karyotype, multilineage dysplasia, percentage of bone marrow blasts, IPSS, Hb level, ferritin level, type of ESA, and addition of G-CSF had no significant influence on response |
|                        |                                                                                                                                                                                                                                                           |                         | IPSS Int         |                                  | $N = 55$ , OR: 1 (CI: NR); $p = \text{REF}$            | NA                         | NA                                            |                                                                                                                                                                                                              |

Abbreviations: CI = confidence interval; DPO = darbepoetin; EPO = erythropoietin; ESA = erythropoiesis-stimulating agent; G-CSF = granulocyte colony-stimulating factor; GDF-15 = growth/differentiation factor-15; Hb = hemoglobin; HR = hazard ratio; Int = Intermediate; IPSS = International Prognostic Scoring System; IPSS-R = Revised IPSS; IWG = International Working Group; MDS = myelodysplastic syndromes; MDS-CAN = Myelodysplastic Syndromes Registry of Canada; NA = not available; NR = not reported; OR = odds ratio; WHO = World Health Organization.

**Bolded results are from multivariate analyses.**

<sup>a</sup>Reference for response criteria: IWG 2006 [12].

**Table S10.** Studies comparing IPSS risk as a prognostic factor for response vs. non-response to ESA treatment.

| Author, Year                         | Intervention                                                                                              | ESA-Treated Sample Size | IPSS Risk Categories | Response Definition <sup>a</sup> | Factors Adjusted for in Multivariate Analysis | Patient Response Status | (%)       | Is the Result Significant?    |
|--------------------------------------|-----------------------------------------------------------------------------------------------------------|-------------------------|----------------------|----------------------------------|-----------------------------------------------|-------------------------|-----------|-------------------------------|
| Boggio et al., 2021 [57]             | ESAs (mixed), weekly, EPO- $\alpha$ 20,000–80,000 IU; DPO 150–300 $\mu$ g                                 | 96                      | Low                  | IWG 2006 MDS criteria            | NR                                            | Responder               | 40 (63)   | $p = 0.013$ , significant     |
|                                      |                                                                                                           |                         |                      |                                  |                                               | Non-responder           | 15 (48)   |                               |
|                                      |                                                                                                           |                         | Int-1                |                                  |                                               | Responder               | 23 (37)   |                               |
|                                      |                                                                                                           |                         |                      |                                  |                                               | Non-responder           | 16 (52)   |                               |
| Gotlib et al., 2009 [36]             | DPO- $\alpha$ , NR, weekly, 250–1100 $\mu$ g $\pm$ G-CSF                                                  | 24                      | Low and Int-1        | IWG 2006 MDS criteria            | NA                                            | Responder               | $N = 16$  | $p = 0.1$ , non-significant   |
|                                      |                                                                                                           |                         | Score $\leq 0.5$     |                                  |                                               | Responder               | $N = 14$  | $p = 0.13$ , non-significant  |
|                                      |                                                                                                           |                         | Low and Int-1        |                                  |                                               | Non-responder           | $N = 6$   | REF                           |
|                                      |                                                                                                           |                         | Score $\leq 0.5$     |                                  |                                               | Non-responder           | $N = 4$   | REF                           |
| Moura et al., 2019 [51] <sup>b</sup> | Epoetin- $\alpha$ , NR, weekly, 30,000–60,000 IU                                                          | 36                      | Low                  | IWG 2006 MDS criteria            | NA                                            | Responder               | 18 (100)  | $p < 0.0001$ , significant    |
|                                      |                                                                                                           |                         |                      |                                  |                                               | Non-responder           | 0         |                               |
|                                      |                                                                                                           |                         | Int-1                |                                  |                                               | Responder               | 11 (78.6) |                               |
|                                      |                                                                                                           |                         |                      |                                  |                                               | Non-responder           | 3 (21.4)  |                               |
| Westers et al., 2010 [38]            | Epoetin was started at a dose of 30,000 IU QW. In absence of an increase in Hb of $\geq 1$ g/dL (0.62 mM) | 46                      | Int-2                | IWG 2006 MDS criteria            | NA                                            | Responder               | 0         | $p = 0.183$ , non-significant |
|                                      |                                                                                                           |                         |                      |                                  |                                               | Non-responder           | 1 (100)   |                               |
|                                      |                                                                                                           |                         | Low                  |                                  |                                               | Responder               | 12 (67)   |                               |
|                                      |                                                                                                           |                         |                      |                                  |                                               | Non-responder           | 13 (46)   |                               |
|                                      |                                                                                                           |                         | Int-1                |                                  |                                               | Responder               | 6 (33)    |                               |
|                                      |                                                                                                           |                         |                      |                                  |                                               | Non-responder           | 15 (54)   |                               |

| Author,<br>Year            | Intervention                                                                                                 | ESA-<br>Treated<br>Sample<br>Size | IPSS Risk<br>Categories                                            | Response<br>Definition <sup>a</sup>                                         | Factors<br>Adjusted for<br>in<br>Multivariate<br>Analysis | Patient<br>Response<br>Status | (%)          | Is the Result Significant?    |
|----------------------------|--------------------------------------------------------------------------------------------------------------|-----------------------------------|--------------------------------------------------------------------|-----------------------------------------------------------------------------|-----------------------------------------------------------|-------------------------------|--------------|-------------------------------|
|                            | within 6 weeks, epoetin dose was escalated to 60,000 IU according to Hellström-Lindberg et al., [63] + G-CSF |                                   |                                                                    |                                                                             |                                                           |                               |              |                               |
| Stasi et al., 2005 [33]    | DPO- $\alpha$ , SC, QW, 150 $\mu$ g fixed dose <sup>c</sup>                                                  | 53                                | Low/Int-1                                                          | IWG 2000 MDS criteria                                                       | NA                                                        | Responder                     | Ratio: 13/11 | $p = 0.418$ , non-significant |
|                            |                                                                                                              |                                   |                                                                    |                                                                             |                                                           | Non-responder                 | Ratio: 16/13 |                               |
| Balleari et al., 2011 [43] | rhEPO, SC, QW for minimum 12 weeks, 40,000 IU                                                                | 55                                | Score 0<br>Score 0.5<br>Score 1<br>Score 0<br>Score 0.5<br>Score 1 | IWG 2006 MDS criteria                                                       | NA                                                        | Responder                     | 21 (67.7)    | $p = 0.45$ , non-significant  |
|                            |                                                                                                              |                                   |                                                                    |                                                                             |                                                           | Responder                     | 13 (68.4)    |                               |
|                            |                                                                                                              |                                   |                                                                    |                                                                             |                                                           | Responder                     | 2 (40)       |                               |
|                            |                                                                                                              |                                   |                                                                    |                                                                             |                                                           | Non-responder                 | 10 (32.3)    |                               |
|                            |                                                                                                              |                                   |                                                                    |                                                                             |                                                           | Non-responder                 | 6 (31.6)     |                               |
|                            |                                                                                                              |                                   |                                                                    |                                                                             |                                                           | Non-responder                 | 3 (60)       |                               |
| Ferrero et al., 2009 [37]  | rhEPO (epoetin- $\alpha$ in the majority, epoetin- $\beta$ in a few patients) was added at different         | 63                                | IPSS<br>Int-1                                                      | IWG 2000 MDS criteria.<br>Responses were then re-evaluated according to IWG | NA                                                        | Responder                     | 8 (50)       | $p = 1$ , non-significant     |
|                            |                                                                                                              |                                   |                                                                    |                                                                             |                                                           | Responder                     | 17 (59)      | $p = 1$ , non-significant     |

| Author, Year              | Intervention                                                                                                                                                                               | ESA-Treated Sample Size | IPSS Risk Categories | Response Definition <sup>a</sup> | Factors Adjusted for in Multivariate Analysis | Patient Response Status | (%)      | Is the Result Significant?     |
|---------------------------|--------------------------------------------------------------------------------------------------------------------------------------------------------------------------------------------|-------------------------|----------------------|----------------------------------|-----------------------------------------------|-------------------------|----------|--------------------------------|
|                           | dosages and schedules according to different institutions and period of treatment<br>Weekly, 60,000 U (30,000–80,000) + 13-cis-retinoic acid and dihydroxylated vitamin D3 ± 6-thioguanine |                         | Int-2                | 2006 MDS criteria                |                                               | Responder               | 1 (33)   | $p = 0.544$ , non-significant  |
| Frisan et al., 2010 [40]  | ESAs (mixed), NR, epoetin- $\alpha$ or - $\beta$ weekly. DPO- $\alpha$ weekly. Epoetin- $\alpha$ or - $\beta$ at doses of 60,000 IU. DPO- $\alpha$ 300 $\mu$ g ± G-CSF                     | 127                     | Low                  | IWG 2006 MDS criteria            | NA                                            | Responder               | 40 (58)  | $p = 1$ , non-significant      |
|                           |                                                                                                                                                                                            |                         | Int-1                |                                  |                                               | Responder               | 29 (42)  |                                |
|                           |                                                                                                                                                                                            |                         | Low                  |                                  |                                               | Non-responder           | 27 (56)  |                                |
|                           |                                                                                                                                                                                            |                         | Int-1                |                                  |                                               | Non-responder           | 21 (44)  |                                |
| Mannone et al., 2006 [34] | DPO- $\alpha$ , SC, QW, 300 $\mu$ g                                                                                                                                                        | 62                      | Low                  | IWG 2000 MDS criteria            | NA                                            | Responder               | 16 (62)  | $p = 0.066$ , non-significant  |
|                           |                                                                                                                                                                                            |                         | Int-1                |                                  |                                               | Responder               | 26 (84)  |                                |
|                           |                                                                                                                                                                                            |                         | Int-2                |                                  |                                               | Responder               | 8 (50)   |                                |
| Rosati et al., 2019 [55]  | EPO- $\alpha$ , NR, weekly, 80,000 IU                                                                                                                                                      | 193                     | Low                  | IWG 2006 MDS criteria            | NA                                            | Responder               | NR       | $p = 0.022$ , significant      |
|                           |                                                                                                                                                                                            | 37                      | Low                  |                                  | NA                                            | Responder               | 16 (100) | $p = 0.0965$ , non-significant |

| Author,<br>Year          | Intervention                                            | ESA-<br>Treated<br>Sample<br>Size | IPSS Risk<br>Categories | Response<br>Definition <sup>a</sup>                                      | Factors<br>Adjusted for<br>in<br>Multivariate<br>Analysis | Patient<br>Response<br>Status | (%)     | Is the Result Significant?     |
|--------------------------|---------------------------------------------------------|-----------------------------------|-------------------------|--------------------------------------------------------------------------|-----------------------------------------------------------|-------------------------------|---------|--------------------------------|
| Antelo et al., 2019 [52] | EPO- $\alpha$ , DPO,<br>or EPO- $\alpha$ and<br>DPO, NR |                                   | Intermediate risk       | IWG MDS 2006<br>and the IWG<br>MDS/MPN 2015<br>response criteria<br>[62] |                                                           | Non-<br>responder             | 16 (84) | $p = 0.0965$ , non-significant |
|                          |                                                         |                                   |                         |                                                                          |                                                           | Responder                     | 0       |                                |
|                          |                                                         |                                   |                         |                                                                          |                                                           | Non-<br>responder             | 3 (16)  |                                |

Abbreviations: DPO = darbepoetin; EPO = erythropoietin; ESA = erythropoiesis-stimulating agent; G-CSF = granulocyte colony-stimulating factor; Hb = hemoglobin; Int = Intermediate; IPSS = International Prognostic Scoring System; IWG = International Working Group; MDS = myelodysplastic syndromes; MPN = myeloproliferative neoplasm; NA = not available; NR = not reported; QW = once weekly; REF=reference; rhEPO = recombinant human erythropoietin; SC = subcutaneous.

**Bolded results are from multivariate analyses.**

<sup>a</sup>References for response criteria: IWG 2000 [60]; IWG 2006 [12]; IWG MDS 2006 and the IWG MDS/MPN 2015 [62].

<sup>b</sup>Bivariate analysis.

<sup>c</sup>Dose was doubled if after the first 12 weeks there was no or suboptimal erythroid response.

**Table S11.** Quantitative associations of karyotype and response to ESA.

| Author, Year                | Intervention                                                                        | ESA-Treated Sample Size | Karyotype Information                                   | Response Definition <sup>a</sup> | Effect Measure                                                        | Is the Result Significant? | Author Interpretation of Results                                                                                                                                                                             |
|-----------------------------|-------------------------------------------------------------------------------------|-------------------------|---------------------------------------------------------|----------------------------------|-----------------------------------------------------------------------|----------------------------|--------------------------------------------------------------------------------------------------------------------------------------------------------------------------------------------------------------|
| Buckstein et al., 2017 [47] | ESAs (mixed), EPO 40,000 IU/week or DPO 300–500 µg Q2–3 weeks, for minimum 12 weeks | 996                     | Karyotype for IPSS                                      | IWG 2006 MDS criteria            | OR: NR (model fitting information R <sup>2</sup> (%): 4.47)           | Non-significant            | NR                                                                                                                                                                                                           |
|                             |                                                                                     |                         | Karyotype for IPSS: Good vs. Poor                       |                                  | OR: 2.57 (CI: NR) (model fitting information R <sup>2</sup> (%): NA)  | Significant                |                                                                                                                                                                                                              |
|                             |                                                                                     |                         | Karyotype for IPSS: Int vs. Poor                        |                                  | OR: 1.56 (CI: NR) (model fitting information R <sup>2</sup> (%): NA)  | Non-significant            |                                                                                                                                                                                                              |
|                             |                                                                                     |                         | Karyotype for IPSS: Good vs. Int                        |                                  | OR: 1.64 (CI: NR) (model fitting information R <sup>2</sup> (%): NA)  | Non-significant            |                                                                                                                                                                                                              |
|                             |                                                                                     |                         | IPSS Karyotype (Good vs. Int/Poor)                      |                                  | OR: 2.4 (CI: NR) (model fitting information R <sup>2</sup> (%): 2.56) | Non-significant            |                                                                                                                                                                                                              |
|                             |                                                                                     |                         | Karyotype categories (3 categories)                     |                                  | OR: NR (model fitting information R <sup>2</sup> (%): 4.88)           | Non-significant            |                                                                                                                                                                                                              |
|                             |                                                                                     |                         | Karyotype categories: Very good/Good vs. Poor/Very poor |                                  | OR: 2.73 (CI: NR) (model fitting information R <sup>2</sup> (%): NA)  | Significant                |                                                                                                                                                                                                              |
|                             |                                                                                     |                         | Karyotype categories: Int vs. Poor/Very poor            |                                  | OR: 1.39 (CI: NR) (model fitting information R <sup>2</sup> (%): NA)  | Non-significant            |                                                                                                                                                                                                              |
|                             |                                                                                     |                         | Karyotype categories: Very good/Good vs. Int            |                                  | OR: 1.96 (CI: NR) (model fitting information R <sup>2</sup> (%): NA)  | Significant                |                                                                                                                                                                                                              |
| Park et al., 2010 [39]      | ESAs (mixed), weekly, epoetin- $\alpha$ or - $\beta$ : 60,000 IU; DPO: 300 µg       | 112                     | Favorable karyotype                                     | IWG 2006 MDS criteria            | OR: 1 (CI: NR)                                                        | NA                         | Age, gender, WHO diagnosis, karyotype, multilineage dysplasia, percentage of bone marrow blasts, IPSS, Hb level, ferritin level, type of ESA, and addition of G-CSF had no significant influence on response |
|                             |                                                                                     |                         | Intermediate karyotype                                  |                                  | OR: 1.8 (CI: 0.5–6.2)                                                 | Non-significant            |                                                                                                                                                                                                              |

Abbreviations: CI = confidence interval; DPO = darbepoetin; ESA = erythropoiesis-stimulating agent; G-CSF = granulocyte colony-stimulating factor; Hb = hemoglobin; Int = intermediate; IPSS = International Prognostic Scoring System; IWG = International Working Group; MDS = myelodysplastic syndromes; NA = not available; NR = not reported; OR = odds ratio; WHO = World Health Organization.

<sup>a</sup>Reference for response criteria: IWG 2006 [12].

**Table S12.** Studies comparing karyotype as a prognostic factor for response vs. non-response to ESA treatment.

| Author, Year             | Intervention                                 | ESA-Treated Sample Size | Prognostic Factor: Karyotype | Prognostic Factor Definition | Response Definition <sup>a</sup> | Responder Status | Outcome Parameter, Discrete Variable (N) | p Value, Significance      |
|--------------------------|----------------------------------------------|-------------------------|------------------------------|------------------------------|----------------------------------|------------------|------------------------------------------|----------------------------|
| Moura et al., 2019 [51]  | Epoetin- $\alpha$ , weekly, 30,000–60,000 IU | 36                      | Karyotype category 1         | Normal                       | IWG 2006 MDS criteria            | Responder        | 25                                       | $p = 0.0301$ , significant |
|                          |                                              |                         |                              |                              |                                  | Non-responder    | 3                                        |                            |
|                          |                                              |                         |                              | Changed                      |                                  | Responder        | 4                                        | REF                        |
|                          |                                              |                         |                              |                              |                                  | Non-responder    | 4                                        |                            |
|                          |                                              |                         | Karyotype IPSS-R             | Very poor                    |                                  | Responder        | 0                                        | $p = 0.0015$ , significant |
|                          |                                              |                         |                              |                              |                                  | Non-responder    | 1                                        |                            |
|                          |                                              |                         |                              | Poor                         |                                  | Responder        | 0                                        | REF                        |
|                          |                                              |                         |                              |                              |                                  | Non-responder    | 1                                        |                            |
|                          |                                              |                         |                              | Intermediate                 |                                  | Responder        | 1                                        | REF                        |
|                          |                                              |                         |                              |                              |                                  | Non-responder    | 1                                        |                            |
|                          |                                              |                         |                              | Good                         |                                  | Responder        | 28                                       | REF                        |
|                          |                                              |                         |                              |                              |                                  | Non-responder    | 4                                        |                            |
|                          |                                              |                         | Karyotype category 2         | Normal                       |                                  | Responder        | 25                                       | $p = 0.0205$ , significant |
|                          |                                              |                         |                              |                              |                                  | Non-responder    | 3                                        |                            |
|                          |                                              |                         |                              | del(5q)                      |                                  | Responder        | 3                                        | REF                        |
|                          |                                              |                         |                              |                              |                                  | Non-responder    | 1                                        |                            |
|                          |                                              |                         |                              | Complex                      |                                  | Responder        | 0                                        | REF                        |
|                          |                                              |                         |                              |                              |                                  | Non-responder    | 2                                        |                            |
|                          |                                              |                         |                              | Trisomy                      |                                  | Responder        | 0                                        | REF                        |
|                          |                                              |                         |                              |                              |                                  | Non-responder    | 1                                        |                            |
|                          |                                              |                         |                              | Monosomy                     |                                  | Responder        | 1                                        | REF                        |
|                          |                                              |                         |                              |                              |                                  | Non-responder    | 0                                        |                            |
| Azzara et al., 2011 [42] | rhEPO, bi-weekly for the first 4             | 133                     | With available karyotype     | NR                           | IWG 2000 MDS criteria            | Responder        | 29                                       | NR                         |
|                          |                                              |                         |                              |                              |                                  | Non-responder    | 29                                       |                            |



| Author, Year              | Intervention                                                                                                                                                              | ESA-Treated Sample Size | Prognostic Factor: Karyotype | Prognostic Factor Definition | Response Definition <sup>a</sup>                             | Responder Status | Outcome Parameter, Discrete Variable (N) | p Value, Significance          |
|---------------------------|---------------------------------------------------------------------------------------------------------------------------------------------------------------------------|-------------------------|------------------------------|------------------------------|--------------------------------------------------------------|------------------|------------------------------------------|--------------------------------|
|                           | weeks: if a minor response was achieved, the dose had to be halved (40,000 IU QW)                                                                                         |                         |                              |                              |                                                              |                  |                                          |                                |
| Frisan et al., 2010 [40]  | ESAs (mixed), epoetin- $\alpha$ or - $\beta$ weekly. DPO $\alpha$ weekly. Epoetin- $\alpha$ or - $\beta$ at doses of 60,000 IU. DPO- $\alpha$ 300 $\mu\text{g} \pm$ G-CSF | 127                     | Good karyotype               | NR                           | IWG 2006 MDS criteria                                        | Responder        | 62                                       | $p = 0.273$ , non-significant  |
|                           |                                                                                                                                                                           |                         | Int karyotype                |                              |                                                              |                  | 5                                        |                                |
|                           |                                                                                                                                                                           |                         | Poor karyotype               |                              |                                                              |                  | 2                                        |                                |
|                           |                                                                                                                                                                           |                         | Good karyotype               |                              |                                                              | Non-responder    | 39                                       | REF                            |
|                           |                                                                                                                                                                           |                         | Int karyotype                |                              |                                                              |                  | 9                                        |                                |
|                           |                                                                                                                                                                           |                         | Poor karyotype               |                              |                                                              |                  | 0                                        |                                |
| Mannone et al., 2006 [34] | DPO- $\alpha$ , QW, 300 $\mu\text{g}$                                                                                                                                     | 62                      | Favorable karyotype          | NR                           | IWG 2000 MDS criteria                                        | Responder        | 73                                       | $p = \text{non-significant}$   |
|                           |                                                                                                                                                                           |                         | Int karyotype                | NR                           |                                                              | Responder        | 43                                       |                                |
|                           |                                                                                                                                                                           |                         | Unfavorable karyotype        | NR                           |                                                              | Responder        | 50                                       |                                |
| Antelo et al., 2019 [52]  | EPO- $\alpha$ , DPO, or EPO- $\alpha$ and DPO, NR                                                                                                                         | 37                      | Abnormal karyotype           | NR                           | IWG MDS 2006 and the IWG MDS/MPN 2015 response criteria [62] | Responder        | 0 (0%)                                   | $p = 0.0965$ , non-significant |
|                           |                                                                                                                                                                           |                         |                              | NR                           |                                                              | Non-responder    | 3 (16%)                                  |                                |

| Author, Year             | Intervention                                                        | ESA-Treated Sample Size | Prognostic Factor: Karyotype | Prognostic Factor Definition | Response Definition <sup>a</sup>                                                                                                                                                                                           | Responder Status | Outcome Parameter, Discrete Variable (N) | p Value, Significance        |
|--------------------------|---------------------------------------------------------------------|-------------------------|------------------------------|------------------------------|----------------------------------------------------------------------------------------------------------------------------------------------------------------------------------------------------------------------------|------------------|------------------------------------------|------------------------------|
| Isnard et al., 1994 [23] | rhEPO, TIW, 40 U/kg/day with a progressive increase to 300 U/kg/day | 20                      |                              | NR                           |                                                                                                                                                                                                                            | Responder        | 4                                        |                              |
|                          |                                                                     |                         | Normal karyotype             |                              | CR defined by the correction of anemia, and PR as durable rise in Hb concentration of >1.5 g/dL and/or durable reduction of 50% in transfusion needs during the 3 months of treatment compared to pre-study 3-month period |                  |                                          | $p = 0.12$ , non-significant |
|                          |                                                                     |                         |                              | NR                           |                                                                                                                                                                                                                            | Non-responder    | 5                                        |                              |
|                          |                                                                     |                         |                              | NR                           |                                                                                                                                                                                                                            | Responder        | 0                                        |                              |
|                          |                                                                     |                         | Abnormal karyotype           |                              |                                                                                                                                                                                                                            |                  |                                          | $p = 0.12$ , non-significant |
|                          |                                                                     |                         |                              | NR                           |                                                                                                                                                                                                                            | Non-responder    | 5                                        |                              |

Abbreviations: CR = complete response; DPO = darbepoetin; EPO = erythropoietin; ESA = erythropoiesis-stimulating agent; G-CSF = granulocyte colony-stimulating factor; Hb = hemoglobin; Int = intermediate; IPSS-R = Revised International Prognostic Scoring System; IWG = International Working Group; MDS = myelodysplastic syndromes; MPN = myeloproliferative neoplasm; NR = not reported; PR = partial response; QW = once weekly; REF=reference; rhEPO = recombinant human EPO; TIW = three times per week.

<sup>a</sup>References for response criteria: IWG 2000 [60]; IWG 2006 [12]; IWG MDS 2006 and the IWG MDS/MPN 2015 [62].

**Table S13.** Quantitative associations of serum EPO levels and response to ESA.

| Author, Year                | Intervention                                                                        | ESA-Treated Sample Size | Serum EPO Level Information    | Response Definition <sup>a</sup>        | Effect Measure: Value (95% CI)                                                   | Is the Result Significant? | Factors Adjusted for in Multivariate Analyses                                                                                                                                                                                              | Author Interpretation of Results                                                                                                                                                                                                                                                                                                                                              |
|-----------------------------|-------------------------------------------------------------------------------------|-------------------------|--------------------------------|-----------------------------------------|----------------------------------------------------------------------------------|----------------------------|--------------------------------------------------------------------------------------------------------------------------------------------------------------------------------------------------------------------------------------------|-------------------------------------------------------------------------------------------------------------------------------------------------------------------------------------------------------------------------------------------------------------------------------------------------------------------------------------------------------------------------------|
| Balleari et al., 2019 [54]  | rhEPO, QW/BIW, 40,000 IU                                                            | 445                     | EPO level ≤200 vs. >200 mIU/mL | HI-E according to IWG MDS 2006 criteria | 137 vs. 27, OR: 1.2 (CI: 0.89–1.63); <i>p</i> = 0.23                             | Non-significant            | Age, MDS WHO 2008 classification, bone marrow blasts (<5% vs. ≥5%), endogenous EPO (>200 vs. ≤200 mU/mL), transfusion dependency (yes vs. no), Hb (>8 vs. ≤8 g/dL), ferritin (>350 vs. ≤350 µg/L), and IPSS score (Int-1 or higher vs Low) | Multivariate analysis taking into consideration rhEPO doses, transfusion dependency, serum EPO levels, marrow blast percentage, WHO classification, and IPSS-R, confirmed the predictive value of transfusion dependency (no vs. yes: OR = 1.71, 95% CI 1.30–2.25; <i>p</i> < 0.001) and IPSS-R (Very Low-Low vs. higher risk: OR = 1.45, 95% CI 1.03–2.06; <i>p</i> = 0.035) |
| Buccisano et al., 2016 [46] | ESAs (mixed), weekly, EPO-α 40,000 IU or EPO-β 30,000 IU or DPO 150 µg              | NR                      | EPO level <250 vs. >250 mIU/mL | IWG 2006 MDS criteria                   | Median (IQR) = 45.40 (25.0–103.5), OR: 2.416 (CI: 1.375–4.244); <i>p</i> = 0.002 | Significant                | ESA dosage, transfusion independence, normal creatinine, endogenous EPO levels <50 mIU/mL, Hb levels at ESA start ≥8 g/dL, and ferritin levels                                                                                             | Low endogenous EPO level and baseline transfusion independence confirmed as predictors of response in both univariate and multivariate analyses                                                                                                                                                                                                                               |
| Buckstein et al., 2017 [47] | ESAs (mixed), EPO 40,000 IU/week or DPO 300–500 µg Q2–3 weeks, for minimum 12 weeks | 996                     | EPO level <100 vs. ≥100 mIU/mL | IWG 2006 MDS criteria                   | OR: 3.47 (CI: NR); <i>p</i> < 0.0001                                             | Significant                | NA                                                                                                                                                                                                                                         | Predictive factors for ESA response by univariate analysis included RBC transfusion independence, EPO level, ESA dose, ferritin, Nordic, MDS-CAN, and IPSS-R based scores, IPSS, IPSS-R, and karyotype                                                                                                                                                                        |
|                             |                                                                                     |                         | EPO level <200 vs. ≥200 mIU/mL |                                         | OR: 3.88 (CI: NR); <i>p</i> < 0.0001                                             | Significant                |                                                                                                                                                                                                                                            |                                                                                                                                                                                                                                                                                                                                                                               |
|                             |                                                                                     |                         | EPO level (log)                |                                         | OR: 0.55 (CI: NR); <i>p</i> < 0.0001                                             | Significant                |                                                                                                                                                                                                                                            |                                                                                                                                                                                                                                                                                                                                                                               |

|                              |                                                                                                                                                                                                    |     |                                  |                       |                                               |             |                                                                                                                                |                                                                                                                                                                                                                                                      |
|------------------------------|----------------------------------------------------------------------------------------------------------------------------------------------------------------------------------------------------|-----|----------------------------------|-----------------------|-----------------------------------------------|-------------|--------------------------------------------------------------------------------------------------------------------------------|------------------------------------------------------------------------------------------------------------------------------------------------------------------------------------------------------------------------------------------------------|
| Houston et al., 2017 [48]    | ESAs (not specified)                                                                                                                                                                               | 208 | EPO level <100 vs. ≥100 mIU/mL   | IWG 2006 MDS criteria | OR: 8.3 (CI: NR); $p < 0.0001$                | Significant | Age, IPSS score, IPSS-R score, Hb, blasts%, Nordic score, transfusion status, serum EPO, European ESA score, G-CSF (yes or no) | Lower-risk IPSS and IPSS-R category, bone marrow blasts <5%, higher baseline Hb, higher Nordic score, lower European ESA score, lower EPO level, transfusion independence, and absence of G-CSF use were significantly associated with ESA response  |
|                              |                                                                                                                                                                                                    |     | EPO level (mIU/mL)               |                       | OR: 0.4 (CI: NR); $p < 0.0001$                | Significant |                                                                                                                                |                                                                                                                                                                                                                                                      |
|                              |                                                                                                                                                                                                    |     | EPO level ≤200 vs >200 mIU/mL    |                       | OR: 4.9 (CI: NR); $p = 0.0074$                | Significant |                                                                                                                                |                                                                                                                                                                                                                                                      |
| Latagliata et al., 2008 [35] | rhEPO, BIW, 40,000 IU QW, dosing reduction was considered for patients with Hb increase ≥2 g/dL within the first 2 weeks of therapy and in patients reaching Hb = 12 g/dL at any time in the study | 60  | EPO level                        | IWG 2000 MDS criteria | HR: 0.993 (CI: 0.986–1); $p = 0.046$          | Significant | NA                                                                                                                             | In univariate analysis, factors associated with response were transfusion dependence ( $p = 0.006$ ), serum EPO levels ( $p = 0.046$ ), baseline Hb levels ( $p = 0.003$ ), and cytogenetics (normal karyotype vs. abnormal karyotype; $p = 0.032$ ) |
| Park et al., 2010 [39]       | ESAs (mixed), weekly, epoetin- $\alpha$ or - $\beta$ : 60,000 U; DPO: 300 $\mu$ g                                                                                                                  | 112 | EPO level ≤100 vs. >100 mIU/L    | IWG 2006 MDS criteria | 72 vs. 30, OR: 1 (CI: NR); $p = 0.02$         | Significant | Bone marrow blasts%, serum EPO level, Hb level, time to ESA onset                                                              | In multivariate analysis, interval from diagnosis to onset of ESA of <6 months ( $p = 0.01$ ), Hb level >9 g/dL ( $p = 0.04$ ), and serum EPO <100 IU/L ( $p = 0.02$ ) predicted better response to ESA                                              |
|                              |                                                                                                                                                                                                    |     | EPO level 100–500 vs. ≤100 mIU/L |                       | 30 vs. 72, OR: 0.13 (CI: NR); $p = \text{NR}$ | NR          |                                                                                                                                |                                                                                                                                                                                                                                                      |
| Rosati et al., 2019 [55]     | EPO- $\alpha$ , weekly, 80,000 IU                                                                                                                                                                  | 193 | EPO level <50 mIU/mL             | IWG 2006 MDS criteria | HR: 3.7 (CI: 1.6–8.6); $p = 0.002$            | Significant | NR                                                                                                                             | At multivariate analysis, only endogenous EPO levels <50 mIU/mL (HR 3.7, 95% CI 1.6–8.6; $p = 0.002$ ) and                                                                                                                                           |

|                           |                                                                                                                                                                                                              |    |           |                       |                                          |             |                                                                             | absence of previous transfusion requirement (HR 5.5, 95% CI 2.2–13.1; $p < 0.001$ ) were independent predictors of response |
|---------------------------|--------------------------------------------------------------------------------------------------------------------------------------------------------------------------------------------------------------|----|-----------|-----------------------|------------------------------------------|-------------|-----------------------------------------------------------------------------|-----------------------------------------------------------------------------------------------------------------------------|
| Westers et al., 2010 [38] | Epoetin was started at 30,000 IU QW. In absence of an increase in Hb of $\geq 1$ g/dL (0.62 mM) within 6 weeks, epoetin dose was escalated to 60,000 IU according to Hellström-Lindberg et al., [63] + G-CSF | 46 | EPO level | IWG 2006 MDS criteria | OR: 0.245 (CI: 0.076–0.795); $p = 0.019$ | Significant | Aberrant FCM, serum EPO level, and transfusion requirement before treatment | In our cohort, only aberrant FCM and EPO levels were significant predictors of response to epoetin/G-CSF treatment          |

Abbreviations: BIW = twice per week; CI = confidence interval; DPO = darbepoetin; EPO = erythropoietin; ESA = erythropoiesis-stimulating agent; FCM = flow cytometry; G-CSF = granulocyte colony-stimulating factor; Hb = hemoglobin; HI-E = hematological improvement-erythroid; HR = hazard ratio; Int = Intermediate; IPSS = International Prognostic Scoring System; IPSS-R = Revised IPSS; IQR = interquartile range; IWG = International Working Group; MDS = myelodysplastic syndromes; MDS-CAN = Myelodysplastic Syndromes Registry of Canada; NA = not available; NR = not reported; OR = odds ratio; QW = once weekly; RBC = red blood cell; rhEPO = recombinant human EPO; TIW = three times per week; WHO = World Health Organization.

**Bolded results are from multivariate analyses.**

<sup>a</sup>References for response criteria: IWG 2000 [60]; IWG 2006[12].

**Table S14.** Studies comparing serum EPO level as a prognostic factor for response vs. non-response to ESA treatment.

| Author, Year               | Intervention                                                                                             | N   | Serum EPO Level (U/L) Description | Response Definition <sup>a</sup>                             | Factors Adjusted for in Multivariate Analysis | Responder Status | Outcome Unit of Measurement | Outcome    | p Value, Significance          |
|----------------------------|----------------------------------------------------------------------------------------------------------|-----|-----------------------------------|--------------------------------------------------------------|-----------------------------------------------|------------------|-----------------------------|------------|--------------------------------|
| Antelo et al., 2019 [52]   | EPO- $\alpha$ , DPO, or EPO- $\alpha$ and DPO                                                            | 37  | Serum EPO levels                  | IWG MDS 2006 and the IWG MDS/MPN 2015 response criteria [62] | NA                                            | Responder        | Median (range)              | 28 (8–175) | $p = 0.0814$ , non-significant |
|                            |                                                                                                          |     | Non-responder                     |                                                              |                                               | 112 (19–500)     |                             |            |                                |
|                            |                                                                                                          |     | Serum EPO levels <44              |                                                              |                                               | Responder        | N (%)                       | 7 (88%)    | $p = 0.008$ , significant      |
|                            |                                                                                                          |     | Non-responder                     |                                                              |                                               | 1 (17%)          |                             |            |                                |
| Azzara et al., 2011 [42]   | rhEPO, BIW for the first 4 weeks: if a minor response was achieved, dose had to be halved (40,000 IU QW) | 133 | Serum EPO level <200              | IWG 2000 MDS criteria                                        | NA                                            | Responders       | N                           | 74         | $p < 0.001$ , significant      |
|                            |                                                                                                          |     | Non-responders                    |                                                              |                                               | 12               |                             |            |                                |
|                            |                                                                                                          |     | Serum EPO levels $\geq 200$       |                                                              |                                               | Responders       |                             | 7          | NR                             |
|                            |                                                                                                          |     | Non-responders                    |                                                              |                                               | 13               |                             |            |                                |
| Balleari et al., 2019 [54] | rhEPO, QW/BIW, 40,000 IU                                                                                 | 148 | Serum EPO levels $\leq 200$       | Hematological improvement according to IWG 2006 criteria     | NA                                            | Responders       | N (%)                       | 137 (55.9) | $p = 0.027$ , significant      |
|                            |                                                                                                          | 164 |                                   |                                                              |                                               | Non-responders   |                             | 108 (44.1) |                                |
|                            |                                                                                                          | 148 | Serum EPO levels >200             |                                                              |                                               | Responders       |                             | 27 (40.3)  | NR                             |
|                            |                                                                                                          | 164 | Non-responders                    |                                                              |                                               | 40 (59.7)        |                             |            |                                |
| Balleari et al., 2011 [43] | rhEPO, weekly, for minimum 12 weeks, 40,000 IU                                                           | 55  | Serum EPO levels                  | IWG 2006 MDS criteria                                        | WPSS score and transfusion dependence         | ESA response     | NR                          | NR         | $p < 0.01$ , significant       |
| Castelli et al., 2014 [45] | Biosimilar epoetin- $\alpha$ , 40,000 IU, weekly, for minimum 12 weeks                                   | 16  | Serum EPO levels                  | IWG 2006 MDS criteria                                        | NR                                            | Responders       | Median                      | 27         | $p < 0.001$ , significant      |
|                            |                                                                                                          | 7   |                                   |                                                              |                                               | Non-responders   |                             | 250        |                                |

| Author, Year              | Intervention                                                                                                                                                                                                                                                                        | <i>N</i> | Serum EPO Level (U/L) Description | Response Definition <sup>a</sup>                                                           | Factors Adjusted for in Multivariate Analysis | Responder Status | Outcome Unit of Measurement | Outcome          | <i>p</i> Value, Significance      |
|---------------------------|-------------------------------------------------------------------------------------------------------------------------------------------------------------------------------------------------------------------------------------------------------------------------------------|----------|-----------------------------------|--------------------------------------------------------------------------------------------|-----------------------------------------------|------------------|-----------------------------|------------------|-----------------------------------|
| Ferrero et al., 2009 [37] | rhEPO ( $\alpha$ in most patients, $\beta$ in a few patients) was added at different dosages and schedules according to different institutions and period of treatment<br>Weekly, 60,000 U (30,000–80,000) + 13-cis-retinoic acid and dihydroxylated vitamin D3 $\pm$ 6-thioguanine | 38       | Serum EPO levels <200             | IWG 2000 MDS criteria. Responses were then re-evaluated according to IWG 2006 MDS criteria | NA                                            | Responders       | <i>N</i>                    | 25               | <i>p</i> = 0.703, non-significant |
|                           |                                                                                                                                                                                                                                                                                     | 38       | Serum EPO levels $\geq$ 200       |                                                                                            |                                               | Responders       |                             | 5                |                                   |
| Frisan et al., 2010 [40]  | Epoetin- $\alpha$ or - $\beta$ 60,000 IU weekly.<br>DPO- $\alpha$ 300 $\mu$ g weekly $\pm$ G-CSF                                                                                                                                                                                    | 127      | Serum EPO levels                  | IWG 2006 MDS criteria                                                                      | NA                                            | Responders       | Median (IQR)                | 35 [17-98]       | <i>p</i> = 0.005, significant     |
|                           |                                                                                                                                                                                                                                                                                     |          |                                   |                                                                                            |                                               | Non-responders   |                             | 122 [45-234]     |                                   |
|                           |                                                                                                                                                                                                                                                                                     | 58       | Serum EPO levels <100             |                                                                                            |                                               | Responders       | <i>N</i>                    | 42               | NR                                |
|                           |                                                                                                                                                                                                                                                                                     | 58       | Serum EPO levels <100             |                                                                                            |                                               | Non-responders   |                             | 16               |                                   |
|                           |                                                                                                                                                                                                                                                                                     | 33       | Serum EPO levels $\geq$ 100       |                                                                                            |                                               | Responders       | <i>N</i>                    | 14               | <i>p</i> = 0.006, significant     |
|                           |                                                                                                                                                                                                                                                                                     | 33       | Serum EPO levels $\geq$ 100       |                                                                                            |                                               | Non-responders   |                             | 19               |                                   |
| Gotlib et al., 2009 [36]  | DPO- $\alpha$ , weekly, 250–1100 $\mu$ g $\pm$ G-CSF                                                                                                                                                                                                                                | 16       | Serum EPO levels                  | IWG 2006 MDS criteria                                                                      | NA                                            | Responders       | U/L (range)                 | 102 (12–422)     | <i>p</i> = 0.06, non-significant  |
|                           |                                                                                                                                                                                                                                                                                     | 8        | Serum EPO levels                  |                                                                                            |                                               | Non-responders   |                             | 178 (44–2556)    |                                   |
|                           |                                                                                                                                                                                                                                                                                     | 16       | Serum EPO levels <150             |                                                                                            |                                               | Responders       | <i>N</i>                    | 13               | <i>p</i> = 0.06, non-significant  |
|                           |                                                                                                                                                                                                                                                                                     | 8        | Serum EPO levels <150             |                                                                                            |                                               | Non-responders   |                             | 3                |                                   |
| Hattakitp anitchak        | ESAs (not specified)                                                                                                                                                                                                                                                                | 22       |                                   | IWG 2006 MDS criteria                                                                      | NA                                            | Responders       | Mean (IQR)                  | 27.7 (13.1–58.5) | <i>p</i> = 0.02, significant      |

| Author, Year                         | Intervention                                                                                                                                                                                                                | N  | Serum EPO Level (U/L) Description | Response Definition <sup>a</sup>                                                                                                                                                                                             | Factors Adjusted for in Multivariate Analysis | Responder Status | Outcome Unit of Measurement | Outcome         | p Value, Significance  |
|--------------------------------------|-----------------------------------------------------------------------------------------------------------------------------------------------------------------------------------------------------------------------------|----|-----------------------------------|------------------------------------------------------------------------------------------------------------------------------------------------------------------------------------------------------------------------------|-----------------------------------------------|------------------|-----------------------------|-----------------|------------------------|
| ul et al., 2021 [59]                 |                                                                                                                                                                                                                             | 25 | Serum EPO levels                  |                                                                                                                                                                                                                              |                                               | Non-responders   |                             | 59.1 (25.2–185) |                        |
| Hellström-Lindberg et al., 1997 [26] | ESAs (mixed), SC, weekly, G-CSF 0.3–1.0–3.0 µg/kg/day (in first study cohort), 30–75–150 µg/d SC (in second study cohort) and EPO: 60–120 U/kg/d SC (in first study cohort) and 5000–10,000 U/d SC (in second study cohort) | 41 | Serum EPO levels                  | CR = increase in Hb to >11.5 g/dL; and PR = increase in Hb of >1.5 g/dL or a 100% reduction of RBC transfusion need in combination with a stable Hb level for >6 weeks on study                                              | NA                                            | Responders       | Median (range)              | 118 (6–1144)    | p < 0.001, significant |
|                                      |                                                                                                                                                                                                                             | 57 |                                   |                                                                                                                                                                                                                              |                                               | Non-responders   |                             | 741 (8–5921)    |                        |
| Isnard et al., 1994 [23]             | rhEPO, TIW, 40 U/kg/day with a progressive increase to 300 U/kg/day                                                                                                                                                         | 20 | Serum EPO levels                  | CR defined by the correction of anemia, and PR as a durable rise in Hb concentration of >1.5 g/dL and/or durable reduction of 50% in transfusion needs during the 3 months of treatment compared to pre-study 3-month period | NA                                            | Responders       | Median (range)              | 44 (12–1869)    | p = 0.025, significant |
|                                      |                                                                                                                                                                                                                             |    |                                   |                                                                                                                                                                                                                              |                                               | Non-responders   |                             | 305 (37–3308)   |                        |
| Mannon et al., 2006 [34]             | DPO-α, QW, 300 µg                                                                                                                                                                                                           | 62 | Serum EPO levels <100             | IWG 2000 MDS criteria                                                                                                                                                                                                        | NA                                            | Responders       | N                           | 86              | p = 0.013, significant |
|                                      |                                                                                                                                                                                                                             |    | Serum EPO levels >100             |                                                                                                                                                                                                                              |                                               | Responders       | N                           | 58              |                        |



| Author, Year            | Intervention                                                  | <i>N</i> | Serum EPO Level (U/L) Description | Response Definition <sup>a</sup> | Factors Adjusted for in Multivariate Analysis | Responder Status             | Outcome Unit of Measurement | Outcome                        | <i>p</i> Value, Significance    |
|-------------------------|---------------------------------------------------------------|----------|-----------------------------------|----------------------------------|-----------------------------------------------|------------------------------|-----------------------------|--------------------------------|---------------------------------|
|                         |                                                               |          | Serum EPO levels <200             |                                  |                                               | Responders                   | <i>N</i>                    | 82                             | <i>p</i> = 0.032, significant   |
|                         |                                                               |          | Serum EPO levels >200             |                                  |                                               | Responders                   | <i>N</i>                    | 53                             |                                 |
| Moura et al., 2019 [51] | Epoetin- $\alpha$ , weekly, 30,000–60,000                     | 12       | Serum EPO levels <500             | IWG 2006 MDS criteria            | NA                                            | Responders                   | <i>N</i>                    | 10                             | NA                              |
|                         |                                                               |          |                                   |                                  |                                               | Non-responders               |                             | 2                              | NA                              |
|                         |                                                               | 0        | Serum EPO levels >500             |                                  |                                               | Responders                   |                             | 0                              | NA                              |
|                         |                                                               |          |                                   |                                  |                                               | Non-responders               |                             | 0                              | NA                              |
|                         |                                                               | 10       | Serum EPO levels <200             |                                  |                                               | Responders                   |                             | 9                              | NA                              |
|                         |                                                               |          |                                   |                                  |                                               | Non-responders               |                             | 1                              | NA                              |
|                         |                                                               | 2        | Serum EPO levels >200             |                                  |                                               | Responders                   |                             | 0                              | NA                              |
|                         |                                                               |          |                                   |                                  |                                               | Non-responders               |                             | 2                              | NA                              |
| Muniz et al., 2019 [53] | ESAs (not specified)                                          | 68       | Serum EPO levels                  | IWG MDS criteria <sup>b</sup>    | NA                                            | Responders<br>Non-responders | Median (range)              | 195 (7.7–925)<br>174 (19–1626) | <i>p</i> = 0.8, non-significant |
| Musto et al., 2005 [32] | DPO- $\alpha$ , weekly, 150 $\mu$ g                           | 15       | Serum EPO levels                  | IWG 2000 MDS criteria            | NA                                            | Responders                   | <i>N</i>                    | 11                             | <i>p</i> < 0.001, significant   |
| Park et al., 2019 [49]  | Epoetin-Z, 40,000 IU/week for 12 weeks. If Hb levels exceeded | 33       | Serum EPO levels                  | IWG 2006 MDS criteria            | NA                                            | Responders                   | Mean                        | 65.5                           | <i>p</i> = 0.001, significant   |

| Author, Year              | Intervention                                                                                                                                                                                | N   | Serum EPO Level (U/L) Description | Response Definition <sup>a</sup> | Factors Adjusted for in Multivariate Analysis | Responder Status | Outcome Unit of Measurement | Outcome | p Value, Significance  |
|---------------------------|---------------------------------------------------------------------------------------------------------------------------------------------------------------------------------------------|-----|-----------------------------------|----------------------------------|-----------------------------------------------|------------------|-----------------------------|---------|------------------------|
|                           | 12 g/dL at any time before week 12, the dose of epoetin-Z was reduced to 20,000 IU/week. After week 12, intervals between injections were increased by 1 week if Hb levels exceeded 13 g/dL |     |                                   |                                  |                                               |                  |                             |         |                        |
| Rigolin et al., 2002 [30] | rhEPO, 10,000 U, TIW for 4 months                                                                                                                                                           | 13  | Serum EPO levels < 100            | IWG 2000 MDS criteria.           | NA                                            | Responders       | N                           | 5       | NR                     |
|                           |                                                                                                                                                                                             |     | Serum EPO levels >100             |                                  |                                               | Responders       |                             | 1       |                        |
|                           |                                                                                                                                                                                             |     | Serum EPO levels <100             |                                  |                                               | Non-responders   |                             | 0       |                        |
|                           |                                                                                                                                                                                             |     | Serum EPO levels >100             |                                  |                                               | Non-responders   |                             | 7       |                        |
| Rosati et al., 2019 [55]  | EPO- $\alpha$ , QW, 80,000 IU                                                                                                                                                               | 103 | Serum EPO levels                  | IWG 2006 MDS criteria            | NA                                            | Responders       | NR                          | NR      | p = 0.001, significant |
| Rose et al., 1995 [25]    | rhEPO, TIW, 150 U/kg<br>Monthly dose escalations of 50 U/kg were permitted if                                                                                                               | 72  | Serum EPO levels                  | NR                               | NA                                            | Non-responders   | Mean                        | 168.1   | p < 0.05, Significant  |
|                           |                                                                                                                                                                                             | 28  |                                   |                                  |                                               | Responders       | Mean                        | 70.4    |                        |
|                           |                                                                                                                                                                                             | 72  |                                   |                                  |                                               | Non-responders   | Median                      | 99      | Non-significant        |

| Author, Year            | Intervention                                                                                                                                     | N  | Serum EPO Level (U/L) Description | Response Definition <sup>a</sup>                                                                                                                                                                                                                                                                                                  | Factors Adjusted for in Multivariate Analysis | Responder Status | Outcome Unit of Measurement | Outcome        | p Value, Significance         |
|-------------------------|--------------------------------------------------------------------------------------------------------------------------------------------------|----|-----------------------------------|-----------------------------------------------------------------------------------------------------------------------------------------------------------------------------------------------------------------------------------------------------------------------------------------------------------------------------------|-----------------------------------------------|------------------|-----------------------------|----------------|-------------------------------|
|                         | hematocrit failed to rise                                                                                                                        | 28 | Serum EPO levels                  |                                                                                                                                                                                                                                                                                                                                   |                                               | Responders       | Median                      | 48             |                               |
| Stasi et al., 1999 [27] | G-CSF + rhEPO, TIW, 150–300 U/kg                                                                                                                 | 9  | Serum EPO levels                  | ER categorized as GR, PR, or no response. GR: rise in untransfused Hb concentrations of $\geq 2$ g/dL or 100% decrease in RBC transfusion requirements over the treatment period. PR: increase in untransfused Hb values of 1–2 g/dL or a >50% decrease in RBC transfusion requirements. No response was defined as responses <PR | NA                                            | Responders       | Median (range)              | 175 (73–765)   | Non-significant               |
|                         |                                                                                                                                                  | 17 |                                   |                                                                                                                                                                                                                                                                                                                                   |                                               | Non-responders   |                             | 354 (133–1456) |                               |
| Stasi et al., 2002 [29] | ATRA + rhEPO, TIW, 150–300 U/kg. EPO dose was initiated at 150 U/kg and was increased to 300 U/kg if after 6 weeks there was no or suboptimal ER | 31 | Serum EPO levels                  | NR                                                                                                                                                                                                                                                                                                                                | NA                                            | Responders       | Median (range)              | 322 (80–1115)  | $p = 0.468$ , non-significant |
|                         |                                                                                                                                                  |    |                                   |                                                                                                                                                                                                                                                                                                                                   |                                               | Non-responders   |                             | 467 (125–1482) |                               |
|                         | rhEPO, weekly, 40,000 IU. rhEPO dose was                                                                                                         | 13 |                                   | IWG 2000 MDS criteria                                                                                                                                                                                                                                                                                                             | NA                                            | Responders       | Median (range)              | 483 (116–865)  | $p = 0.872353$ ,              |

| Author, Year               | Intervention                                                                                                                                                                                   | <i>N</i> | Serum EPO Level (U/L) Description | Response Definition <sup>a</sup>                                                                                                                                                     | Factors Adjusted for in Multivariate Analysis | Responder Status             | Outcome Unit of Measurement | Outcome                                         | <i>p</i> Value, Significance     |
|----------------------------|------------------------------------------------------------------------------------------------------------------------------------------------------------------------------------------------|----------|-----------------------------------|--------------------------------------------------------------------------------------------------------------------------------------------------------------------------------------|-----------------------------------------------|------------------------------|-----------------------------|-------------------------------------------------|----------------------------------|
| Stasi et al., 2004 [31]    | increased to 60,000 IU fixed dose if after 6 weeks there was no or suboptimal ER                                                                                                               | 35       | Serum EPO levels                  |                                                                                                                                                                                      |                                               | Non-responders               |                             | 458.5 (138–1142)                                | non-significant                  |
| Stasi et al., 2005 [29]    | DPO- $\alpha$ , weekly, 150 $\mu$ g fixed dose, increased to 300 mg fixed dose if after 12 weeks there was no or suboptimal ER                                                                 | 53       | Serum EPO levels                  | IWG 2000 MDS criteria                                                                                                                                                                | NR                                            | Responders<br>Non-responders | Median (range)              | 96.5 (26–370)<br>275 (56–515); <i>p</i> < 0.001 | <i>p</i> < 0.001, significant    |
| Stein et al., 1991 [22]    | rhEPO, BIW, 800 U/kg for first 4 weeks, increment of 400 U/kg at 4-week interval to max. dose of 1600 U/kg BIW in case of suboptimal response, 1600 U/kg BIW in 12–24 weeks (open-label phase) | 4        | Serum EPO levels                  | Increase in hematocrit of $\geq 4$ percentage points over baseline, independent of transfusions, or elimination of all transfusions with the hematocrit maintained at baseline level | NA                                            | Responders                   | Median (range)              | 550 (16–1030)                                   | <i>p</i> > 0.10, non-significant |
|                            |                                                                                                                                                                                                | 13       |                                   |                                                                                                                                                                                      |                                               | Non-responders               |                             | 190 (42–10,902)                                 |                                  |
|                            |                                                                                                                                                                                                | 4        | Serum EPO levels                  |                                                                                                                                                                                      |                                               | Responders                   | Mean                        | 536                                             | NR                               |
|                            |                                                                                                                                                                                                | 13       |                                   |                                                                                                                                                                                      |                                               | Non-responders               |                             | 1595                                            |                                  |
| Villegas et al., 2011 [41] | DPO- $\alpha$ , 300 $\mu$ g, weekly $\pm$ filgrastim                                                                                                                                           | 44       | Serum EPO levels <100             | IWG 2000 MDS criteria                                                                                                                                                                | NA                                            | Responders                   | <i>N</i>                    | 20                                              | NR                               |
|                            |                                                                                                                                                                                                |          | Serum EPO levels >100             |                                                                                                                                                                                      |                                               | Non-responders               |                             | 5                                               |                                  |
|                            |                                                                                                                                                                                                |          |                                   |                                                                                                                                                                                      |                                               | Responders                   |                             | 5                                               |                                  |
|                            |                                                                                                                                                                                                |          |                                   |                                                                                                                                                                                      |                                               | Non-responders               |                             | 14                                              |                                  |

Abbreviations: ATRA = all-trans retinoic acid; BIW = twice per week; CR = complete response; DPO = darbepoetin; EPO = erythropoietin; ER = erythroid response; ESA = erythropoiesis-stimulating agent; G-CSF = granulocyte colony-stimulating factor; GR = good response; Hb = hemoglobin; IQR = interquartile range; IWG = International Working Group; MDS = myelodysplastic syndromes; MPN = myeloproliferative neoplasm; NA = not applicable; NR = not reported; PR = partial response; QW = once weekly; RBC = red blood cell; rhEPO = recombinant human EPO; SC = subcutaneous; TIW = three times per week; U/L = upper/lower; WPSS = World Health Organization classification-based Prognostic Scoring System.

**Bolded results are from multivariate analyses.**

<sup>a</sup>References for response criteria: IWG 2000 [60]; IWG 2006 [12]; IWG MDS 2006 and the IWG MDS/MPN 2015 [62].

**Table S15.** Quantitative associations of transfusion dependence and response to ESA.

| Author, Year                 | Intervention                                                                                         | ESA-Treated Sample Size | Transfusion Dependence Information                                                                                                            | Response Definition   | Effect Measure: Value (95% CI)           | Is the Result Significant? | Factors Adjusted for in Multivariate Analyses | Author Interpretation of Results                                                                                                                                                                                                                        |
|------------------------------|------------------------------------------------------------------------------------------------------|-------------------------|-----------------------------------------------------------------------------------------------------------------------------------------------|-----------------------|------------------------------------------|----------------------------|-----------------------------------------------|---------------------------------------------------------------------------------------------------------------------------------------------------------------------------------------------------------------------------------------------------------|
| Buccisano et al., 2016 [46]  | ESAs (mixed), weekly, EPO- $\alpha$ 40,000 IU or EPO- $\beta$ 30,000 IU, or DPO 150 $\mu$ g          | NR                      | Transfusion requirement at initiation of treatment (no vs. yes)                                                                               | IWG 2006 MDS criteria | OR: 4.077 (CI: 2.206–7.537); $p < 0.001$ | Significant                | NA                                            | Low endogenous EPO level and baseline transfusion independence were confirmed as predictors of response in both univariate and multivariate analyses                                                                                                    |
| Buckstein et al., 2017 [47]  | ESAs (mixed), EPO 40,000 IU/week or DPO 300–500 $\mu$ g Q2–3 weeks, for minimum 12 weeks             | 996                     | Transfusion status (assessed by Nordic system)                                                                                                | IWG 2006 MDS criteria | OR: 2.4 (CI: NR); $p < 0.0001$           | Significant                | NA                                            | Predictive factors for ESA response by univariate analysis included RBC transfusion independence, EPO level, ESA dose, ferritin, Nordic, MDS-CAN, and IPSS-R based scores, IPSS, IPSS-R, and karyotype                                                  |
|                              |                                                                                                      |                         | Transfusion status (assessed by WPSS system)                                                                                                  |                       | OR: 4.3 (CI: NR); $p < 0.0001$           | Significant                | NA                                            |                                                                                                                                                                                                                                                         |
| Houston et al., 2017 [48]    | EPO 40–60,000 IU/week or DPO 300–500 $\mu$ g Q2–3 weeks                                              | 208                     | Transfusion independence vs. transfusion dependence (dependence defined as $\geq 1$ RBC transfusion every 8 weeks, over a period of 4 months) | IWG 2006 MDS criteria | OR: 2.7 (CI: NR); $p = 0.001$            | Significant                | NA                                            | Lower-risk IPSS and IPSS-R category, bone marrow blasts $<5\%$ , higher baseline Hb, higher Nordic score, lower European ESA score, lower EPO level, transfusion independence, and absence of G-CSF use were significantly associated with ESA response |
| Latagliata et al., 2008 [35] | rhEPO, BIW, 40,000 IU QW dosing reduction was considered for patients with Hb increase $\geq 2$ g/dL | 60                      | Transfusion dependent vs. transfusion free                                                                                                    | IWG 2000 MDS criteria | HR: 2.867 (CI: 1.354–6.07); $p = 0.006$  | Significant                | NA                                            | In the present study, transfusion independence and baseline Hb levels were the most important clinical factors associated with higher response rates; on the whole, these findings point to the need of EPO treatment being                             |

| Author, Year                | Intervention                                                                                       | ESA-Treated Sample Size | Transfusion Dependence Information                                                                                                 | Response Definition   | Effect Measure: Value (95% CI)    | Is the Result Significant? | Factors Adjusted for in Multivariate Analyses | Author Interpretation of Results                                                                                                                                                                                                                                                                                                                                                                                                                                           |
|-----------------------------|----------------------------------------------------------------------------------------------------|-------------------------|------------------------------------------------------------------------------------------------------------------------------------|-----------------------|-----------------------------------|----------------------------|-----------------------------------------------|----------------------------------------------------------------------------------------------------------------------------------------------------------------------------------------------------------------------------------------------------------------------------------------------------------------------------------------------------------------------------------------------------------------------------------------------------------------------------|
|                             | within the first 2 weeks of therapy and in patients reaching Hb = 12 g/dL at any time of the study |                         |                                                                                                                                    |                       |                                   |                            |                                               | initiated as soon as possible after MDS diagnosis, when a consistent residual normal hemopoiesis may still be present                                                                                                                                                                                                                                                                                                                                                      |
| Raimbault et al., 2019 [50] | EPO- $\alpha/\beta/Z$ or DPO                                                                       | 47                      | RBC transfusion dependent (defined as the receipt of $\geq 2$ RBC concentrates over the 8 weeks preceding flow cytometry analysis) | IWG 2006 MDS criteria | OR: 0.14 (0.03–0.69); $p = 0.016$ | Significant                | NR                                            | The parameters associated with ESA response were tested using univariate analysis. Only two were significantly associated with ESA response: the absence of RBC-transfusion dependence ( $p = 0.004$ ) and CD117/c-KIT+ EP $\geq 3\%$ ( $p = 0.001$ ), while IPSS-R had no significant influence. In a multivariate logistic regression, CD117/c-KIT+ EP $\geq 3\%$ still predicted ESA response ( $p = 0.006$ ) independent of RBC-transfusion dependence ( $p = 0.016$ ) |

Abbreviations: BIW = twice per week; CI = confidence interval; DPO = darbepoetin; EPO = erythropoietin; ESA = erythropoiesis-stimulating agent; G-CSF = granulocyte colony-stimulating factor; Hb = hemoglobin; HR = hazard ratio; IPSS = International Prognostic Scoring System; IPSS-R = Revised IPSS; IWG = International Working Group; MDS = myelodysplastic syndromes; MDS-CAN = Myelodysplastic Syndromes Registry of Canada; NA = not available; NR = not reported; OR = odds ratio; RBC = red blood cell; rhEPO = recombinant human EPO; WPSS = World Health Organization classification-based Prognostic Scoring System.

**Bolded results are from multivariate analyses.**

<sup>a</sup>References for response criteria: IWG 2000 [60]; IWG 2006 [12].

**Table S16.** Studies comparing transfusion dependence as a prognostic factor for response vs. non-response to ESA treatment.

| Author<br>, Year                     | Intervention                                                                       | <i>N</i> | Transfusi<br>on<br>Dependen<br>ce<br>Descriptio<br>n | Response Definition <sup>a</sup>                                           | Factors<br>Adjusted for in<br>Multivariate<br>Analysis                                                                                                                                                                                                                                                        | Responder<br>Status | Outcome<br>Unit of<br>Measurement | Outcome     | <i>p</i> Value,<br>Significance       |  |  |  |  |
|--------------------------------------|------------------------------------------------------------------------------------|----------|------------------------------------------------------|----------------------------------------------------------------------------|---------------------------------------------------------------------------------------------------------------------------------------------------------------------------------------------------------------------------------------------------------------------------------------------------------------|---------------------|-----------------------------------|-------------|---------------------------------------|--|--|--|--|
| Ballear<br>i et al.,<br>2019<br>[54] | rhEPO,<br>QW/BIW,<br>40,000 IU                                                     | 148      | Transfusi<br>on<br>dependent                         | IWG 2006 MDS<br>criteria                                                   | Age, MDS<br>WHO 2008<br>classificatio<br>n, bone<br>marrow<br>blasts (<5%<br>vs. ≥5%),<br>endogenous<br>EPO (>200<br>vs. ≤200<br>mU/mL),<br>transfusion<br>dependency<br>(yes vs. no),<br>Hb (>8 vs<br>≤8 g/dL),<br>ferritin<br>(>350 vs.<br>≤350 µg/L),<br>and IPSS<br>score (Int-1<br>or higher vs.<br>low) | Responders          | <i>N</i> (%)                      | 29 (33.3%)  | <i>p</i> < 0.001,<br>significant      |  |  |  |  |
|                                      |                                                                                    | 164      |                                                      |                                                                            |                                                                                                                                                                                                                                                                                                               | Non-<br>responders  |                                   | 58 (66.7%)  |                                       |  |  |  |  |
|                                      |                                                                                    | 148      |                                                      |                                                                            |                                                                                                                                                                                                                                                                                                               | Responders          |                                   | 135 (60.0%) |                                       |  |  |  |  |
|                                      |                                                                                    | 164      | Not<br>transfusio<br>n<br>dependent                  |                                                                            |                                                                                                                                                                                                                                                                                                               | Non-<br>responders  |                                   | 90 (40.0%)  |                                       |  |  |  |  |
|                                      |                                                                                    |          |                                                      |                                                                            |                                                                                                                                                                                                                                                                                                               |                     |                                   |             |                                       |  |  |  |  |
| Boggio<br>et al.,<br>2021<br>[57]    | Weekly EPO<br>α 20,000–<br>80,000 IU;<br>DPO 150–300<br>µg                         | 65       | Transfusi<br>onal need                               | IWG 2006 MDS<br>criteria                                                   | NR                                                                                                                                                                                                                                                                                                            | Responders          | <i>N</i> (%)                      | 12 (18)     | <i>p</i> = 0.193, non-<br>significant |  |  |  |  |
|                                      |                                                                                    | 31       |                                                      |                                                                            |                                                                                                                                                                                                                                                                                                               | Non-<br>responders  |                                   | 10 (32)     |                                       |  |  |  |  |
| Ferrero<br>et al.,<br>2009<br>[37]   | rhEPO (α<br>most patients,<br>β in a few<br>patients) was<br>added at<br>different | 44       | Transfusio<br>n<br>dependent                         | IWG 2000 MDS<br>criteria.<br>Responses were then<br>re-evaluated according | NA                                                                                                                                                                                                                                                                                                            | Responders          | <i>N</i> (%)                      | 27 (61)     | <i>p</i> = 1, non-<br>significant     |  |  |  |  |
|                                      |                                                                                    | 19       | Non-<br>transfused                                   |                                                                            |                                                                                                                                                                                                                                                                                                               | Responders          |                                   | 11 (58)     |                                       |  |  |  |  |



| Author<br>, Year                  | Intervention                                                                                                                                                                                                                                 | <i>N</i> | Transfusi<br>on<br>Dependen<br>ce<br>Descriptio<br>n            | Response Definition <sup>a</sup> | Factors<br>Adjusted for in<br>Multivariate<br>Analysis | Responder<br>Status | Outcome<br>Unit of<br>Measurement | Outcome | <i>p</i> Value,<br>Significance  |
|-----------------------------------|----------------------------------------------------------------------------------------------------------------------------------------------------------------------------------------------------------------------------------------------|----------|-----------------------------------------------------------------|----------------------------------|--------------------------------------------------------|---------------------|-----------------------------------|---------|----------------------------------|
|                                   | dosages and<br>schedules<br>according to<br>different<br>institutions<br>and period of<br>treatment,<br>weekly,<br>60,000 U<br>(30,000–<br>80,000) + 13-<br>cis-retinoic<br>acid and<br>dihydroxylate<br>d vitamin D3<br>± 6-<br>thioguanine |          |                                                                 | to IWG 2006 MDS<br>criteria.     |                                                        |                     |                                   |         |                                  |
| Frisan<br>et al.,<br>2010<br>[40] | Epoetin- $\alpha$ or - $\beta$ 60,000 IU<br>weekly. DPO- $\alpha$ 300 $\mu$ g<br>weekly $\pm$ G-<br>CSF                                                                                                                                      | 54       | Transfusio<br>ns                                                | IWG 2006 MDS<br>criteria         | NA                                                     | Responders          | <i>N</i>                          | 35      | NR                               |
|                                   |                                                                                                                                                                                                                                              | 54       | Transfusio<br>n                                                 |                                  |                                                        | Responders          |                                   | 8       | <i>p</i> < 0.001,<br>significant |
|                                   |                                                                                                                                                                                                                                              | 19       | requiremen<br>ts <2<br>units/mont<br>h                          |                                  |                                                        | Non-responders      |                                   | 0       |                                  |
|                                   |                                                                                                                                                                                                                                              | 54       | Transfusio<br>n<br>requiremen<br>ts $\geq$ 2<br>units/mont<br>h |                                  |                                                        | Responders          |                                   | 16      |                                  |
|                                   |                                                                                                                                                                                                                                              | 19       |                                                                 |                                  |                                                        | Non-responders      |                                   | 29      |                                  |
|                                   |                                                                                                                                                                                                                                              |          |                                                                 |                                  |                                                        |                     |                                   |         |                                  |

| Author, Year                 | Intervention                                                                                                                                                                                            | N              | Transfusion Dependence Description                      | Response Definition <sup>a</sup>                                                                                                                                                                                               | Factors Adjusted for in Multivariate Analysis | Responder Status                                       | Outcome Unit of Measurement | Outcome                      | p Value, Significance        |
|------------------------------|---------------------------------------------------------------------------------------------------------------------------------------------------------------------------------------------------------|----------------|---------------------------------------------------------|--------------------------------------------------------------------------------------------------------------------------------------------------------------------------------------------------------------------------------|-----------------------------------------------|--------------------------------------------------------|-----------------------------|------------------------------|------------------------------|
| Isnard et al., 1994 [23]     | rhEPO, TIW, 40 U/kg/day with a progressive increase to 300 U/kg/day                                                                                                                                     | 7<br><hr/> 13  | Patient received transfusion in 3 months prior to study | CR defined by the correction of anemia, and PR as a durable rise in Hb concentration of >1.5 g/dL and/or a durable reduction of 50% in transfusion needs during the 3 months of treatment compared to pre-study 3-month period | NA                                            | Responders<br><hr/> Non-responders                     | Median (range)              | 6 (0–12)<br><hr/> 12 (0–16)  | $p > 0.05$ , non-significant |
| Latagliata et al., 2008 [35] | rhEPO, BIW, 40,000 IU QW dosing reduction was considered for patients with Hb increase $\geq 2$ g/dL within the first 2 weeks of therapy and in patients reaching Hb = 12 g/dL at any time in the study | 28<br><hr/> 32 | Transfusion on free<br><br>Transfusion dependent        | IWG 2000 MDS criteria                                                                                                                                                                                                          | NR                                            | Responders<br><br>Responders                           | <br><br>N (%)               | 19 (67.8%)<br><br>11 (34.3%) | NR<br><br>NR                 |
| Moura et al., 2019 [51]      | Epoetin- $\alpha$ , weekly, 30,000–60,000                                                                                                                                                               | 29<br><hr/> 29 | Transfusion dependent                                   | IWG 2006 MDS criteria                                                                                                                                                                                                          | NA                                            | Responders<br><hr/> Non-responders<br><hr/> Responders | <br><br>N                   | 2<br><hr/> 5<br><hr/> 27     | $p = 0.001$ , Significant    |

| Author, Year                | Intervention                                                                                                        | N  | Transfusion Dependence Description             | Response Definition <sup>a</sup> | Factors Adjusted for in Multivariate Analysis | Responder Status | Outcome Unit of Measurement | Outcome    | p Value, Significance             |
|-----------------------------|---------------------------------------------------------------------------------------------------------------------|----|------------------------------------------------|----------------------------------|-----------------------------------------------|------------------|-----------------------------|------------|-----------------------------------|
|                             |                                                                                                                     |    | Not transfusion dependent                      |                                  |                                               | Non-responders   |                             | 2          |                                   |
|                             | ESAs (not specified)                                                                                                | 26 | Transfusion dependence                         | IWG MDS criteria <sup>b</sup>    | NA                                            | Responders       | %                           | 50         | $p = 0.34$ , non-significant      |
|                             |                                                                                                                     | 42 |                                                |                                  |                                               | Non-responders   |                             | 60         |                                   |
| Musto et al., 2005 [32]     | DPO- $\alpha$ , weekly, 150 $\mu\text{g}$                                                                           | 15 | Transfusion requirements $\leq 2/\text{month}$ | IWG 2000 MDS criteria            | NR                                            | NR               | NR                          | NR         | $p < 0.02$ , significant          |
| Raimbaud et al., 2015 [50]  | EPO- $\alpha/\beta/\text{Z}$ or DPO                                                                                 | 47 | Transfusion dependent                          | IWG 2006 MDS criteria            | NA                                            | Responders       | $N(\%)$                     | 4 (9%)     | $p = 0.004$ , significant         |
|                             |                                                                                                                     | 16 |                                                |                                  |                                               | Non-responders   |                             | 7 (44%)    |                                   |
|                             |                                                                                                                     | 47 | Not transfusion dependent                      |                                  |                                               | Responders       |                             | 43 (91%)   |                                   |
|                             |                                                                                                                     | 16 |                                                |                                  |                                               | Non-responders   |                             | 9 (56%)    |                                   |
| Rigolin et al., 2002 [30]   | rhEPO, 10,000 IU, TIW for 4 months                                                                                  | 13 | Transfusion Yes                                | IWG 2000 MDS criteria            | NA                                            | Responders       | $N$                         | 5          | $p = \text{NR}$ , non-significant |
|                             |                                                                                                                     | 13 |                                                |                                  |                                               | Non-responders   |                             | 1          |                                   |
|                             |                                                                                                                     | 13 | Transfusion No                                 |                                  |                                               | Responders       |                             | 3          |                                   |
|                             |                                                                                                                     | 13 |                                                |                                  |                                               | Non-responders   |                             | 4          |                                   |
| Tatarelli et al., 2014 [44] | Epoetin- $\alpha$ 40,000 IU/week or epoetin- $\beta$ 30,000 IU/week, or high dose: epoetin- $\alpha$ 80,000 IU/week | 59 | Transfusion dependent                          | IWG 2006 MDS criteria            | NA                                            | Responders       | $N(\%)$                     | 21 (48.8%) | $p = 0.029$ , significant         |
|                             |                                                                                                                     | 34 |                                                |                                  |                                               | Non-responders   |                             | 17 (80.9%) |                                   |
|                             |                                                                                                                     | 59 |                                                |                                  |                                               | Responders       |                             | 22 (51.2%) |                                   |
|                             |                                                                                                                     | 34 | Not transfusion dependent                      |                                  |                                               | Non-responders   |                             | 4 (19.1%)  |                                   |

| Author<br>, Year                 | Intervention                             | <i>N</i> | Transfusi<br>on<br>Dependen<br>ce<br>Descriptio<br>n | Response Definition <sup>a</sup> | Factors<br>Adjusted for in<br>Multivariate<br>Analysis | Responder<br>Status | Outcome<br>Unit of<br>Measurement | Outcome | <i>p</i> Value,<br>Significance |
|----------------------------------|------------------------------------------|----------|------------------------------------------------------|----------------------------------|--------------------------------------------------------|---------------------|-----------------------------------|---------|---------------------------------|
| Villegas et al.,<br>2011<br>[41] | DPO-α, 300<br>μg, weekly ±<br>filgrastim | 32       | Transfusio<br>n<br>dependent                         | IWG 2000 MDS<br>criteria         | NA                                                     | Responders          | <i>N</i>                          | 8       | NR                              |
|                                  |                                          |          |                                                      |                                  |                                                        | Non-responders      |                                   | 4       |                                 |
|                                  |                                          | 12       | Not<br>transfusion<br>dependent                      |                                  |                                                        | Responders          |                                   | 24      |                                 |
|                                  |                                          |          |                                                      |                                  |                                                        | Non-responders      |                                   | 8       |                                 |

Abbreviations: BIW = twice per week; CR = complete response; DPO = darbepoetin; EPO = erythropoietin; ESA = erythropoiesis-stimulating agent; G-CSF = granulocyte colony-stimulating factor; Int = intermediate; IPSS = International Prognostic Scoring System; IWG = International Working Group; MDS = myelodysplastic syndromes; NA = not available; NR = not reported; PR = partial response; rhEPO = recombinant human EPO; TIW = three times per week; WHO = World Health Organization.

**Bolded results are from multivariate analyses.**

<sup>a</sup>References for response criteria: IWG 2000 [60]; IWG 2006 [12].

<sup>b</sup>IWG criteria used unclear.
